# Supplementary material for: Accurate de novo design of membrane-traversing macrocycles
Source: PubMed Central journal article supplement (PMC9490236; doi:10.1016/j.cell.2022.07.019), 2022-09-15

**Accurate *de novo* design of membrane-traversing macrocycles**

**Supplemental data file 1: Structure prediction plots for all designs.**

Related to Figures 1 and 3.

**Figure D1.1: Structure-energy landscapes and hydrogen-bonding patterns for designed and selected 6-amino acid macrocycles:** Left panels show the torsion bin cluster and predicted conformational landscape for each design. \* denotes N-methylated amino acids. Orange points denote an independently predicted structure with no cis-peptide bonds. Grey points represent predicted structures with at least one cis-peptide bond. Blue dots represent the local minimization of the designed macrocycle structure. For hydrogen bonding graphs, the orange boxes highlight the designed intramolecular hydrogen bonds. Amino acids without a backbone hydrogen bond donor (proline, D-proline, N-methylated amino acids) are marked by darker grey columns. Related to Figure 1.

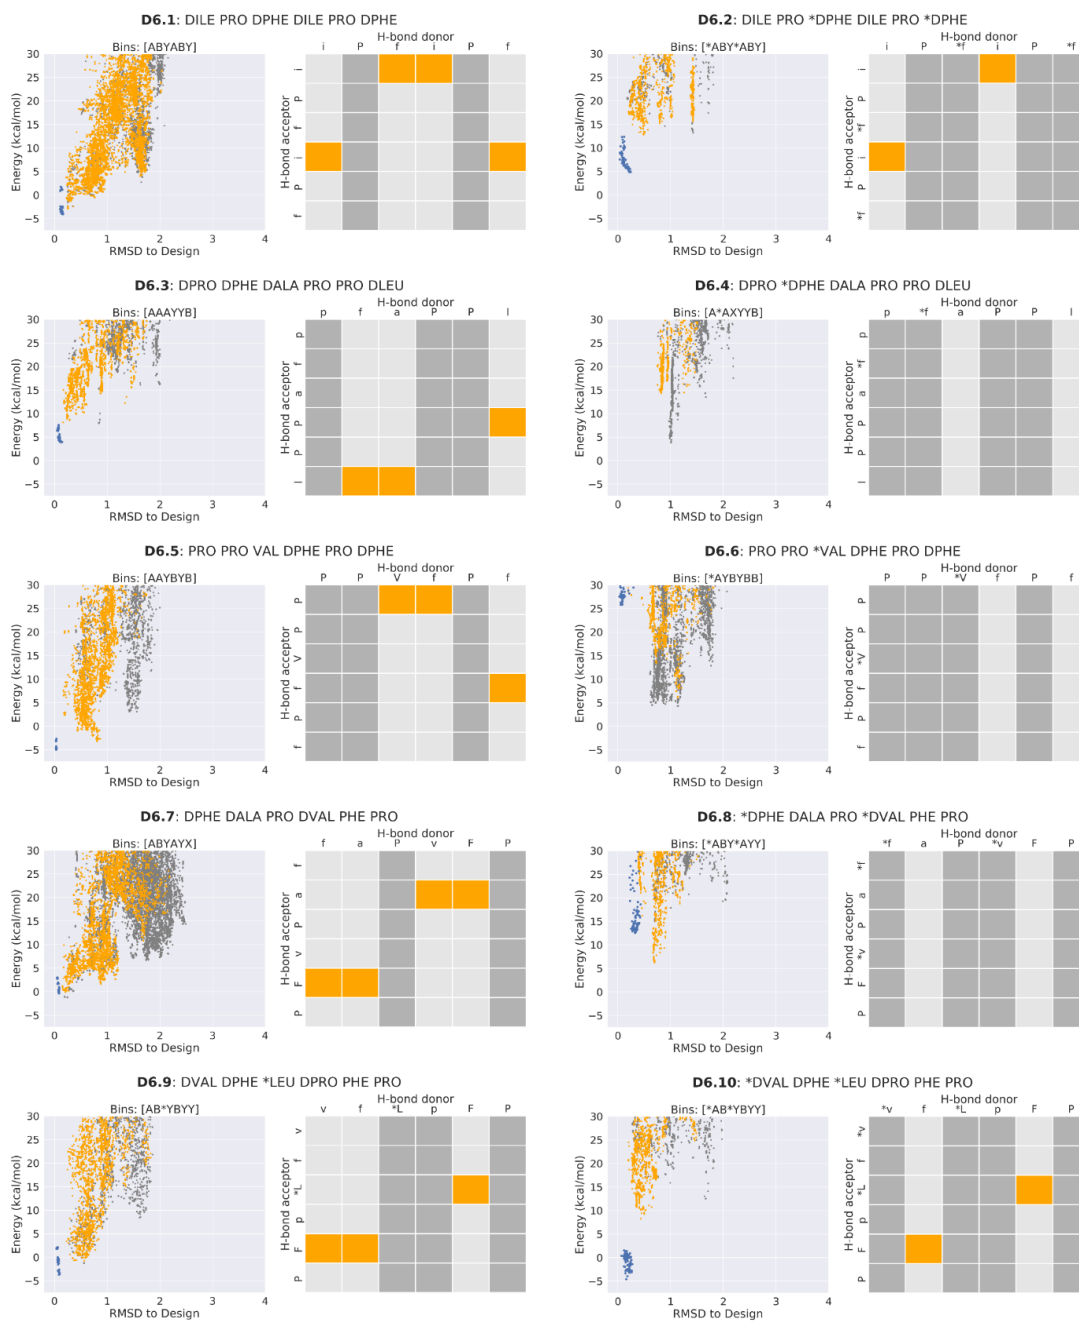

**Figure D1.2: Structure-energy landscapes and hydrogen-bonding patterns for designed and selected 7-amino acid macrocycles:** Left panels show the torsion bin cluster and predicted conformational landscape for each design. \* denotes N-methylated amino acids. Orange points denote an independently predicted structure with no cis-peptide bonds. Grey points represent predicted structures with at least one cis-peptide bond. Blue dots represent the local minimization of the designed macrocycle structure. For hydrogen bonding graphs, the orange boxes highlight the designed intramolecular hydrogen bonds. Amino acids without a backbone hydrogen bond donor (proline, D-proline, N-methylated amino acids) are marked by darker grey columns. Related to Figure 1.

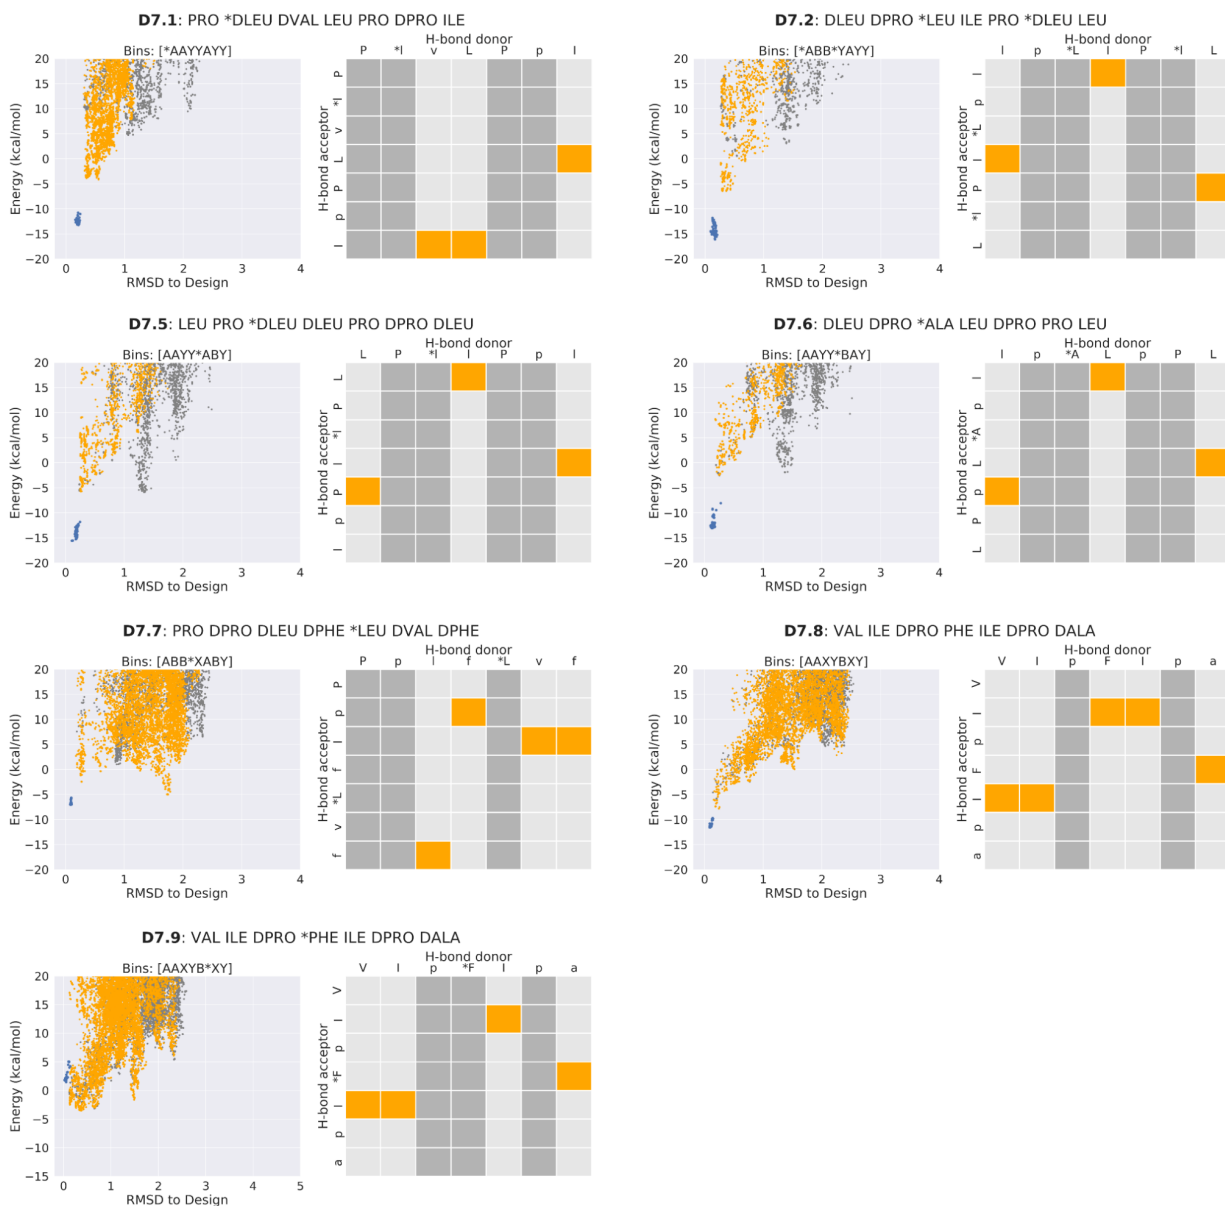

**Figure D1.3: Structure-energy landscapes and hydrogen-bonding patterns for designed and selected 8-amino acid macrocycles:** Left panels show the torsion bin cluster and predicted conformational landscape for each design. \* denotes N-methylated amino acids. Orange points denote an independently predicted structure with no cis-peptide bonds. Grey points represent predicted structures with at least one cis-peptide bond. Blue dots represent the local minimization of the designed macrocycle structure. For hydrogen bonding graphs, the orange boxes highlight the designed intramolecular hydrogen bonds. Amino acids without a backbone hydrogen bond donor (proline, D-proline, N-methylated amino acids) are marked by darker grey columns. Related to Figure 1.

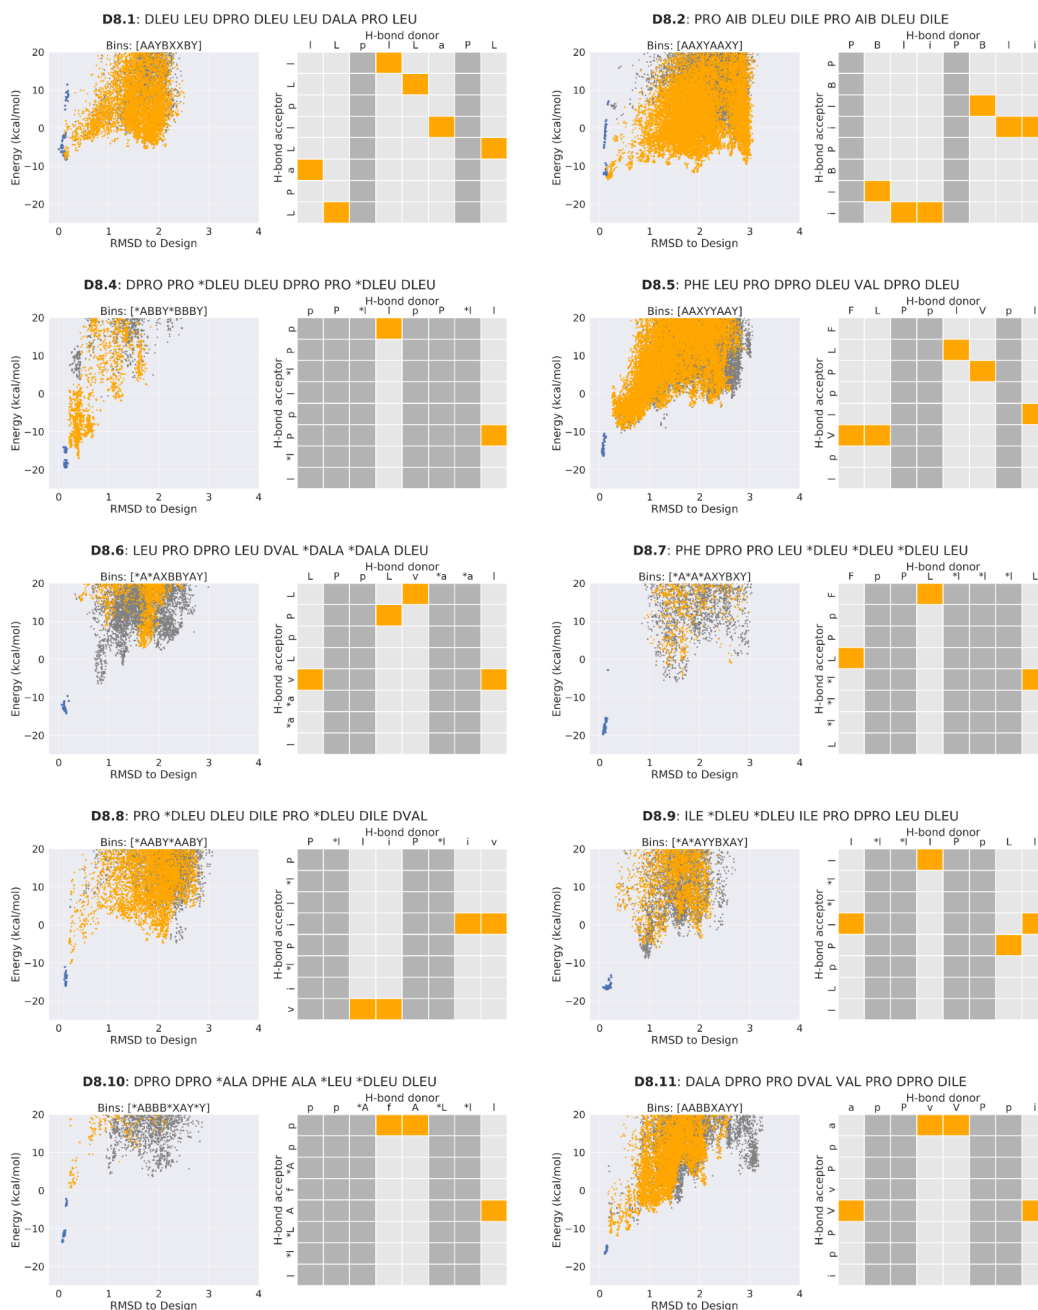

**Figure D1.3 (cont.): Structure-energy landscapes and hydrogen-bonding patterns for designed and selected 8-amino acid macrocycles (full figure legend described earlier). Related to Figure 1.**

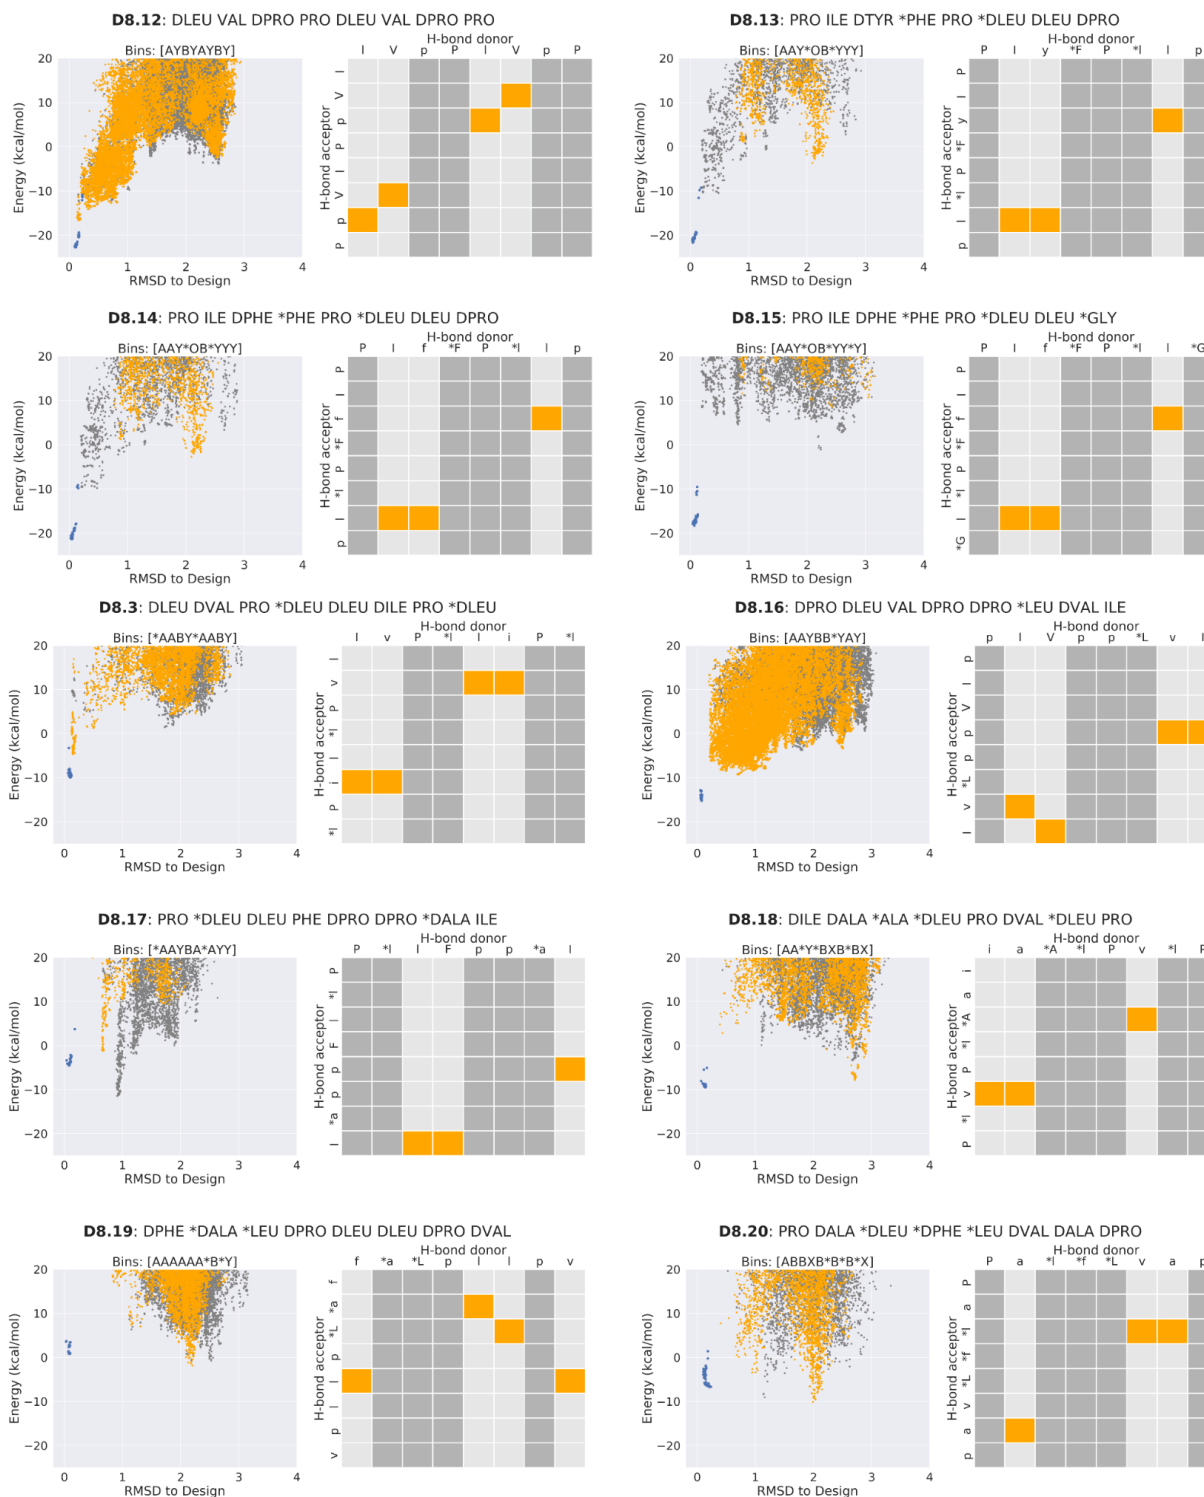

**Figure D1.3 (cont.): Structure-energy landscapes and hydrogen-bonding patterns for designed and selected 8-amino acid macrocycles.** (full figure legend described earlier). Related to Figure 1.

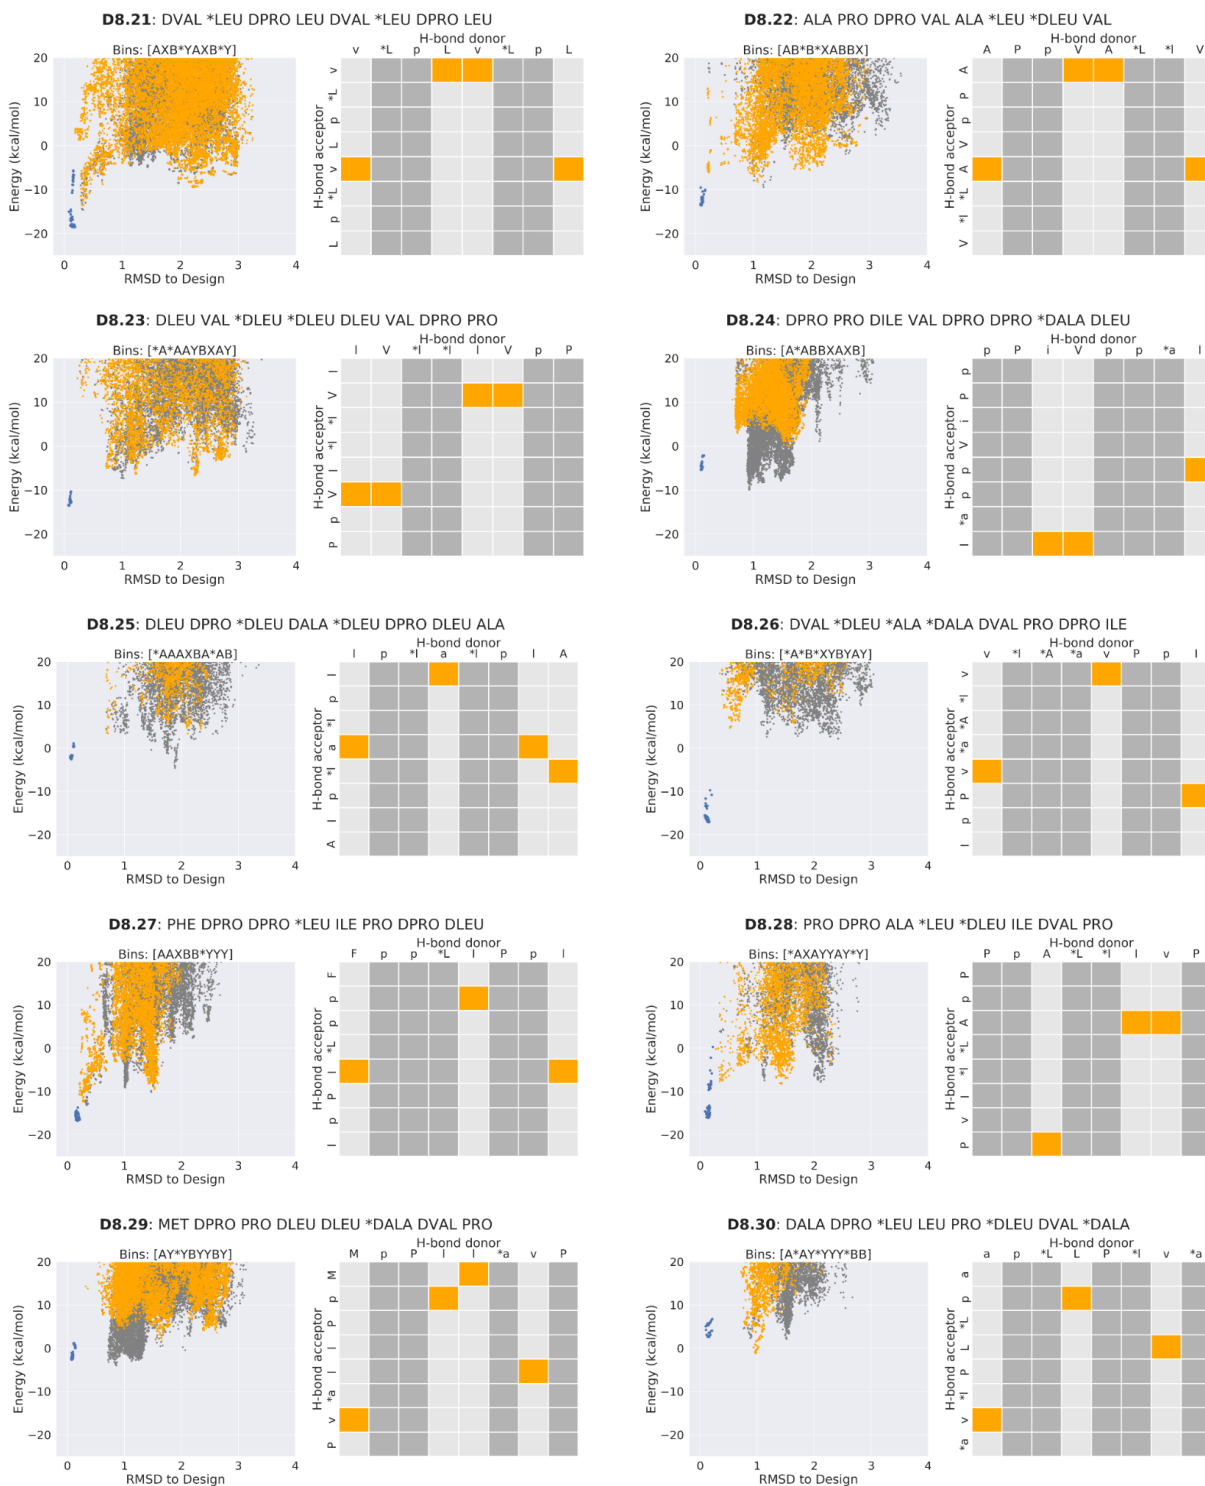

**Figure D1.3 (cont.): Structure-energy landscapes and hydrogen-bonding patterns for designed and selected 8-amino acid macrocycles.** (full figure legend described earlier). Related to Figure 1.

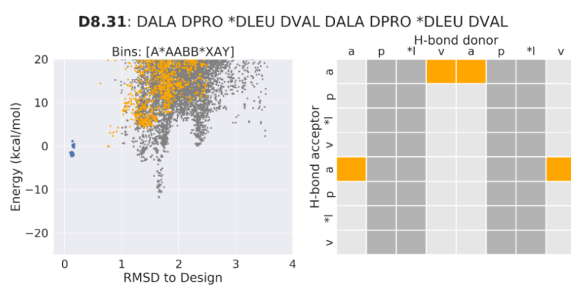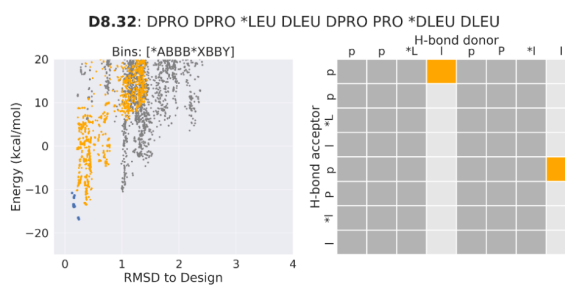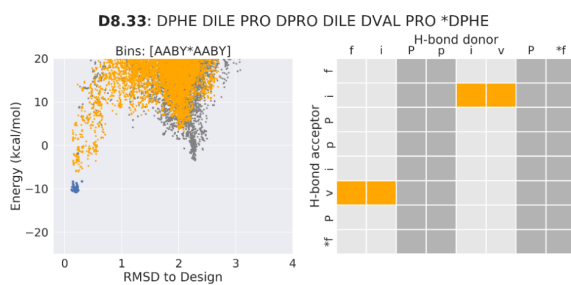

**Figure D1.4: Structure-energy landscapes and hydrogen-bonding patterns for designed and selected 9-amino acid macrocycles:** Left panels show the torsion bin cluster and predicted conformational landscape for each design. \* denotes N-methylated amino acids. Orange points denote an independently predicted structure with no cis-peptide bonds. Grey points represent predicted structures with at least one cis-peptide bond. Blue dots represent the local minimization of the designed macrocycle structure. For hydrogen bonding graphs, the orange boxes highlight the designed intramolecular hydrogen bonds. Amino acids without a backbone hydrogen bond donor (proline, D-proline, N-methylated amino acids) are marked by darker grey columns. Related to Figure 3.

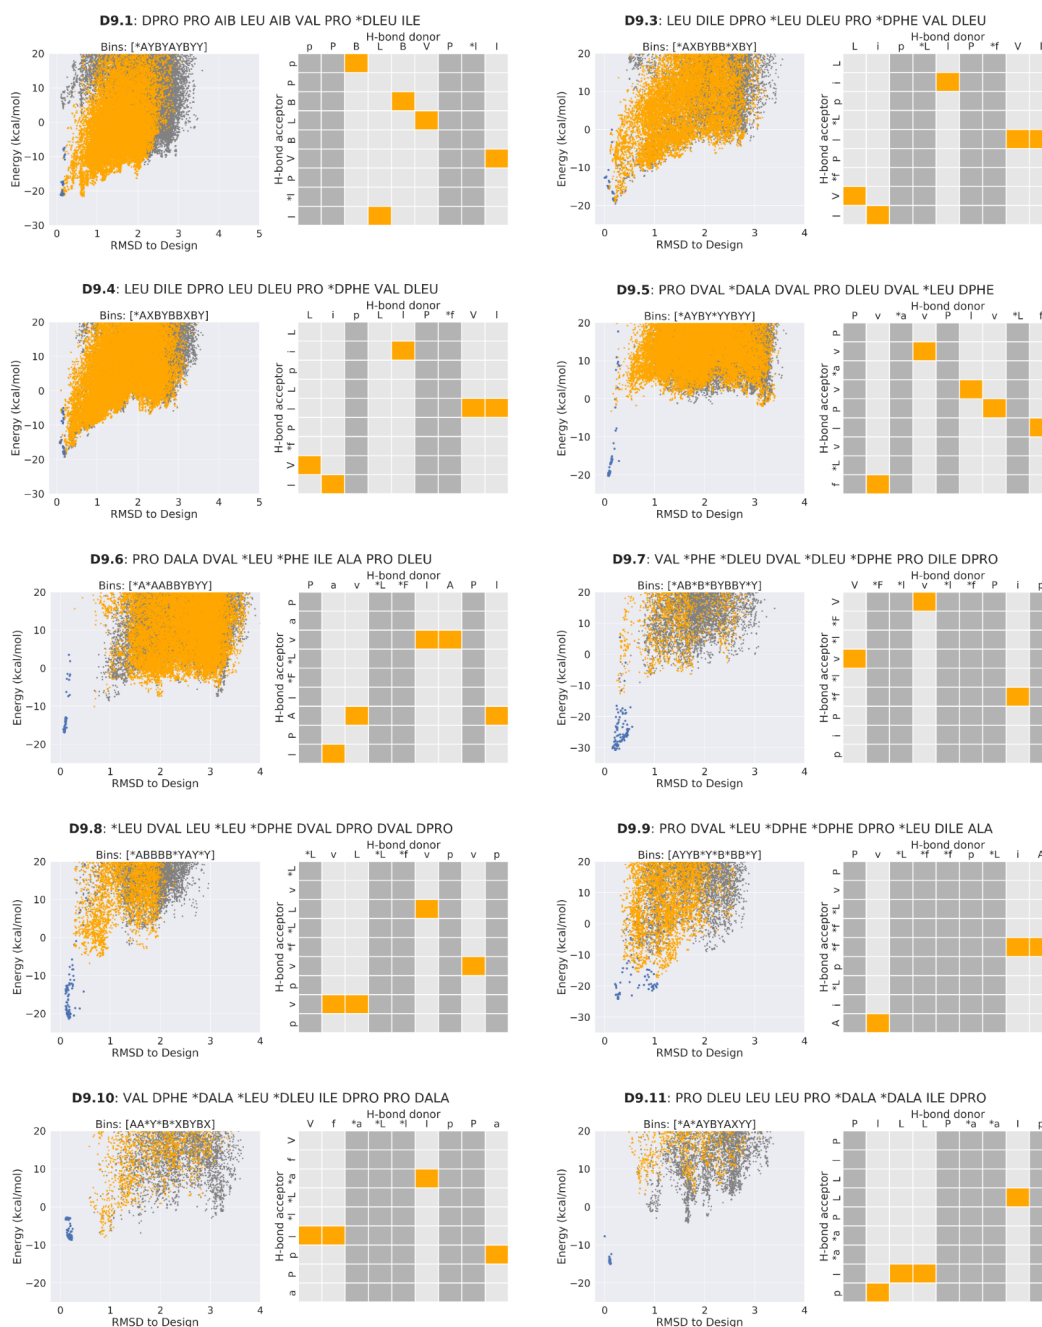



**Figure D1.4 (cont.): Structure-energy landscapes and hydrogen-bonding patterns for designed and selected 9-amino acid macrocycles. (full figure legend described earlier). Related to Figure 3.**

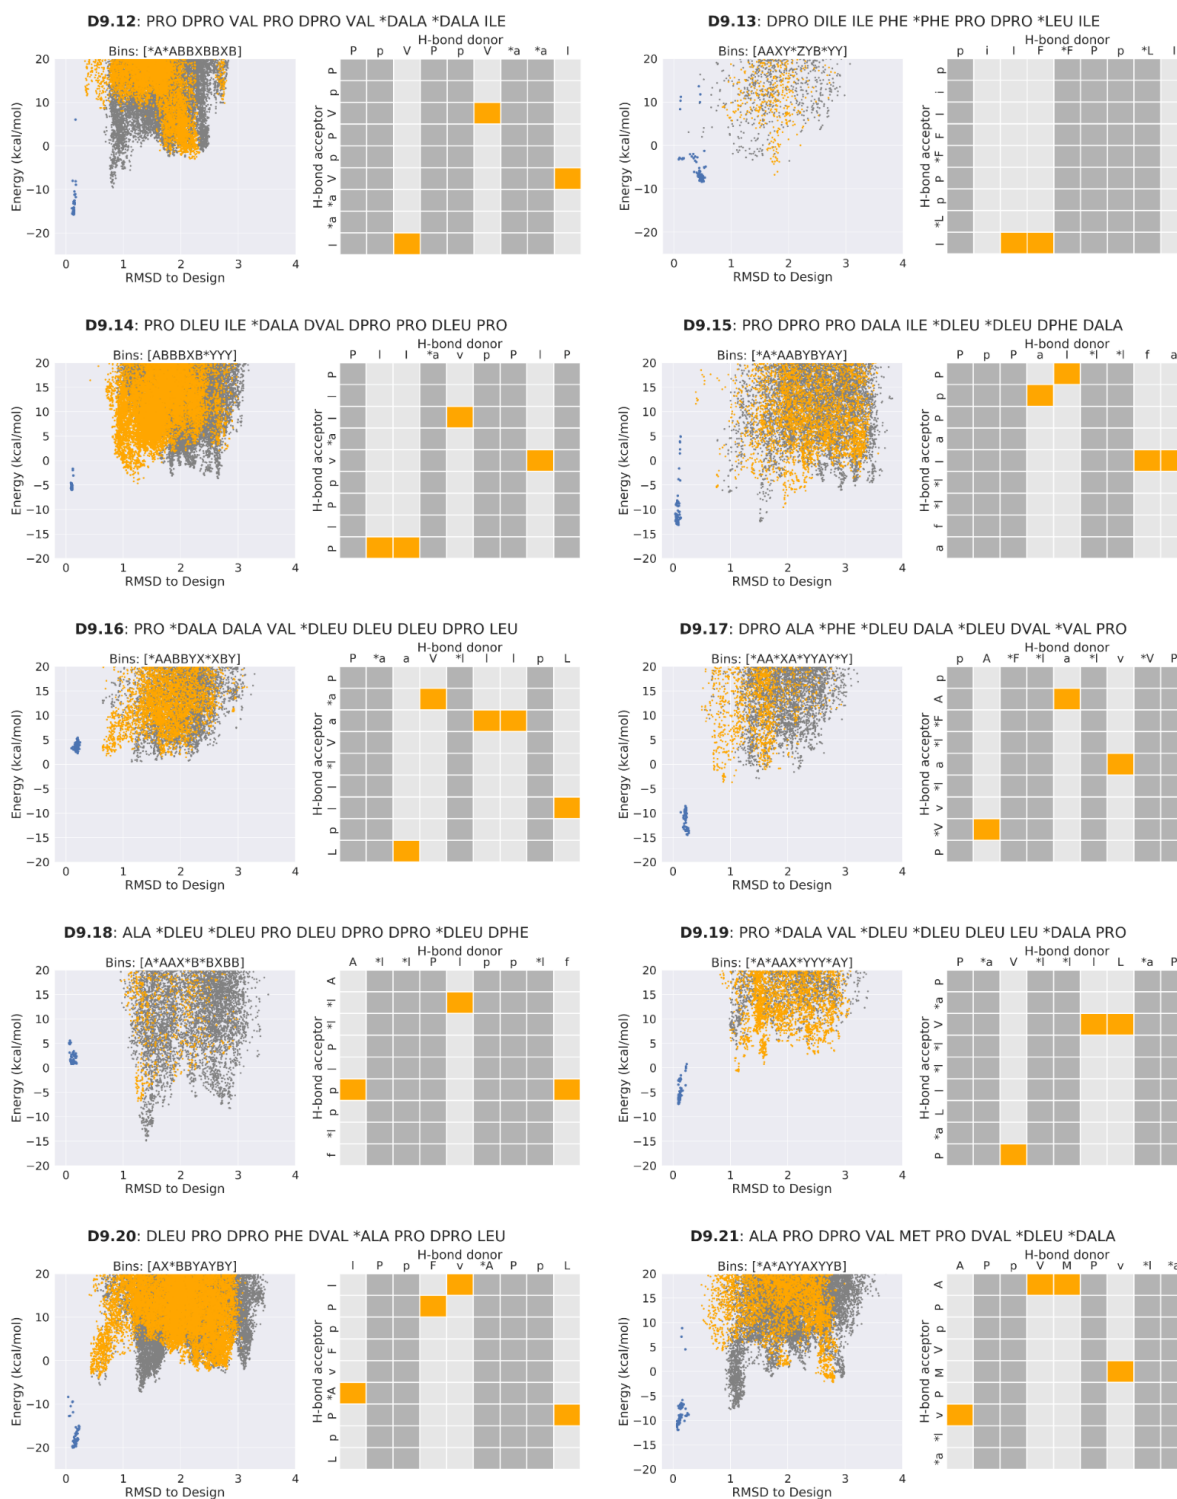

**Figure D1.4 (cont.): Structure-energy landscapes and hydrogen-bonding patterns for designed and selected 9-amino acid macrocycles. (full figure legend described earlier). Related to Figure 3.**

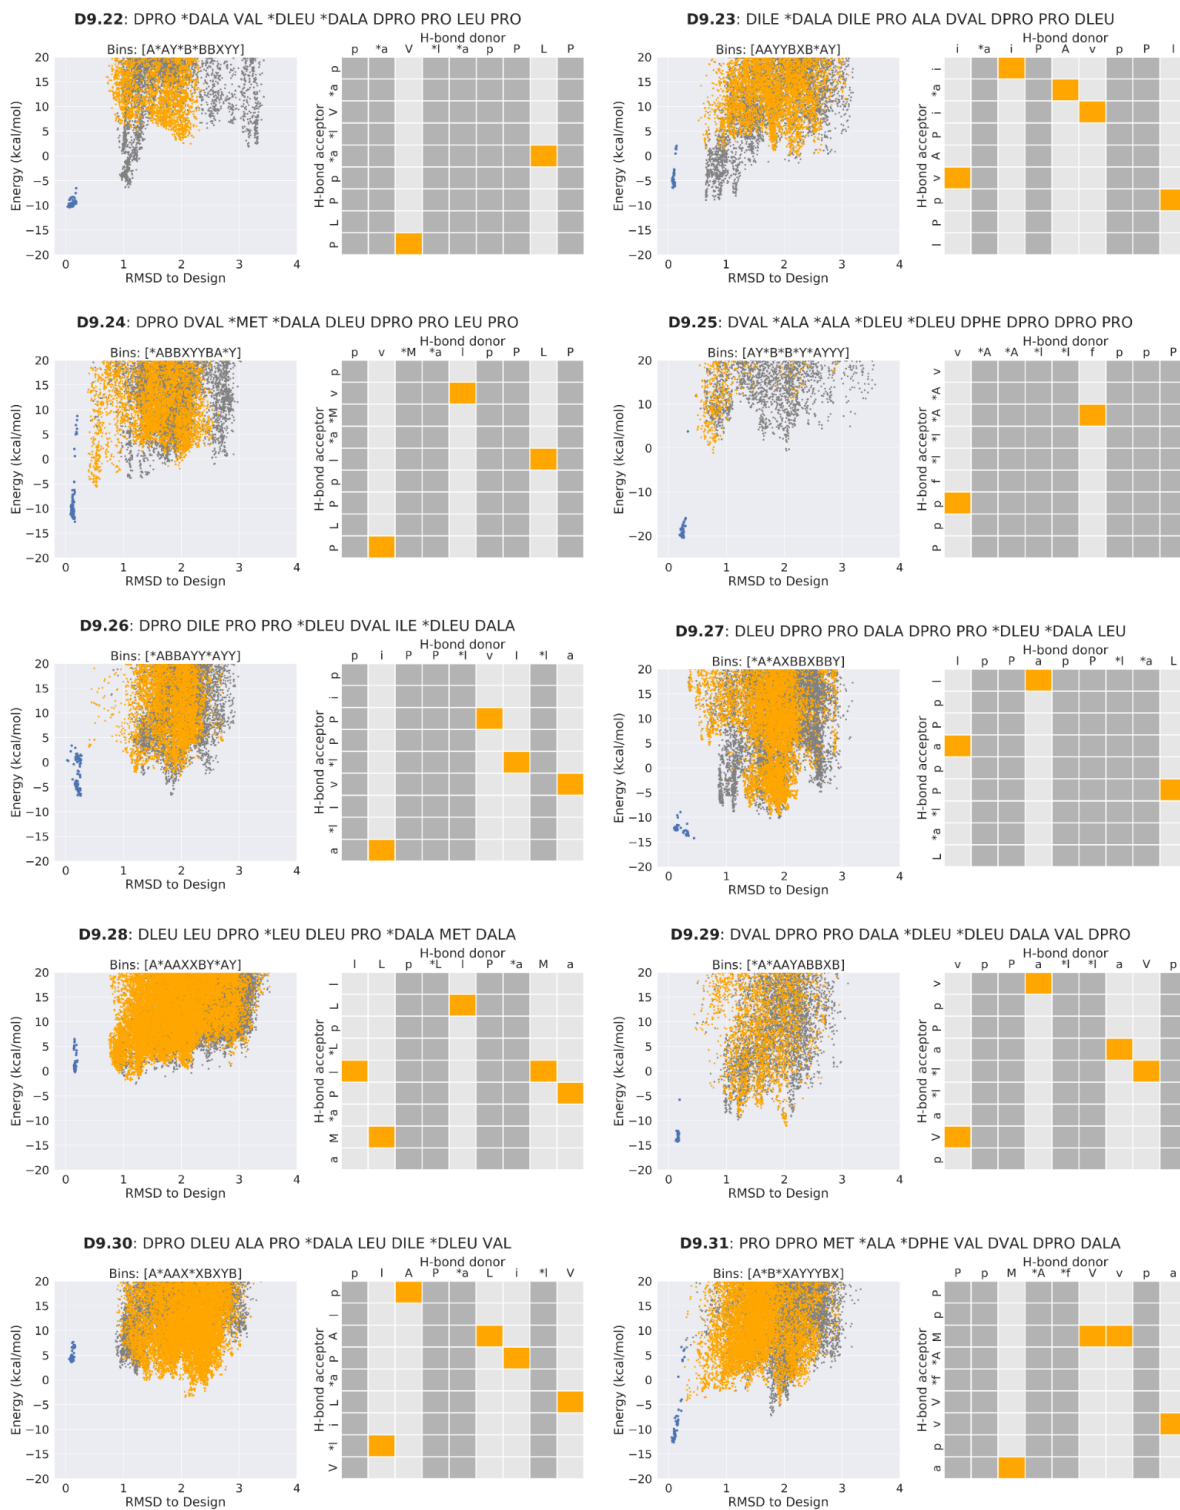

**Figure 1.4 (cont.): Structure-energy landscapes and hydrogen-bonding patterns for designed and selected 9-amino acid macrocycles. (full figure legend described earlier). Related to Figure 3.**

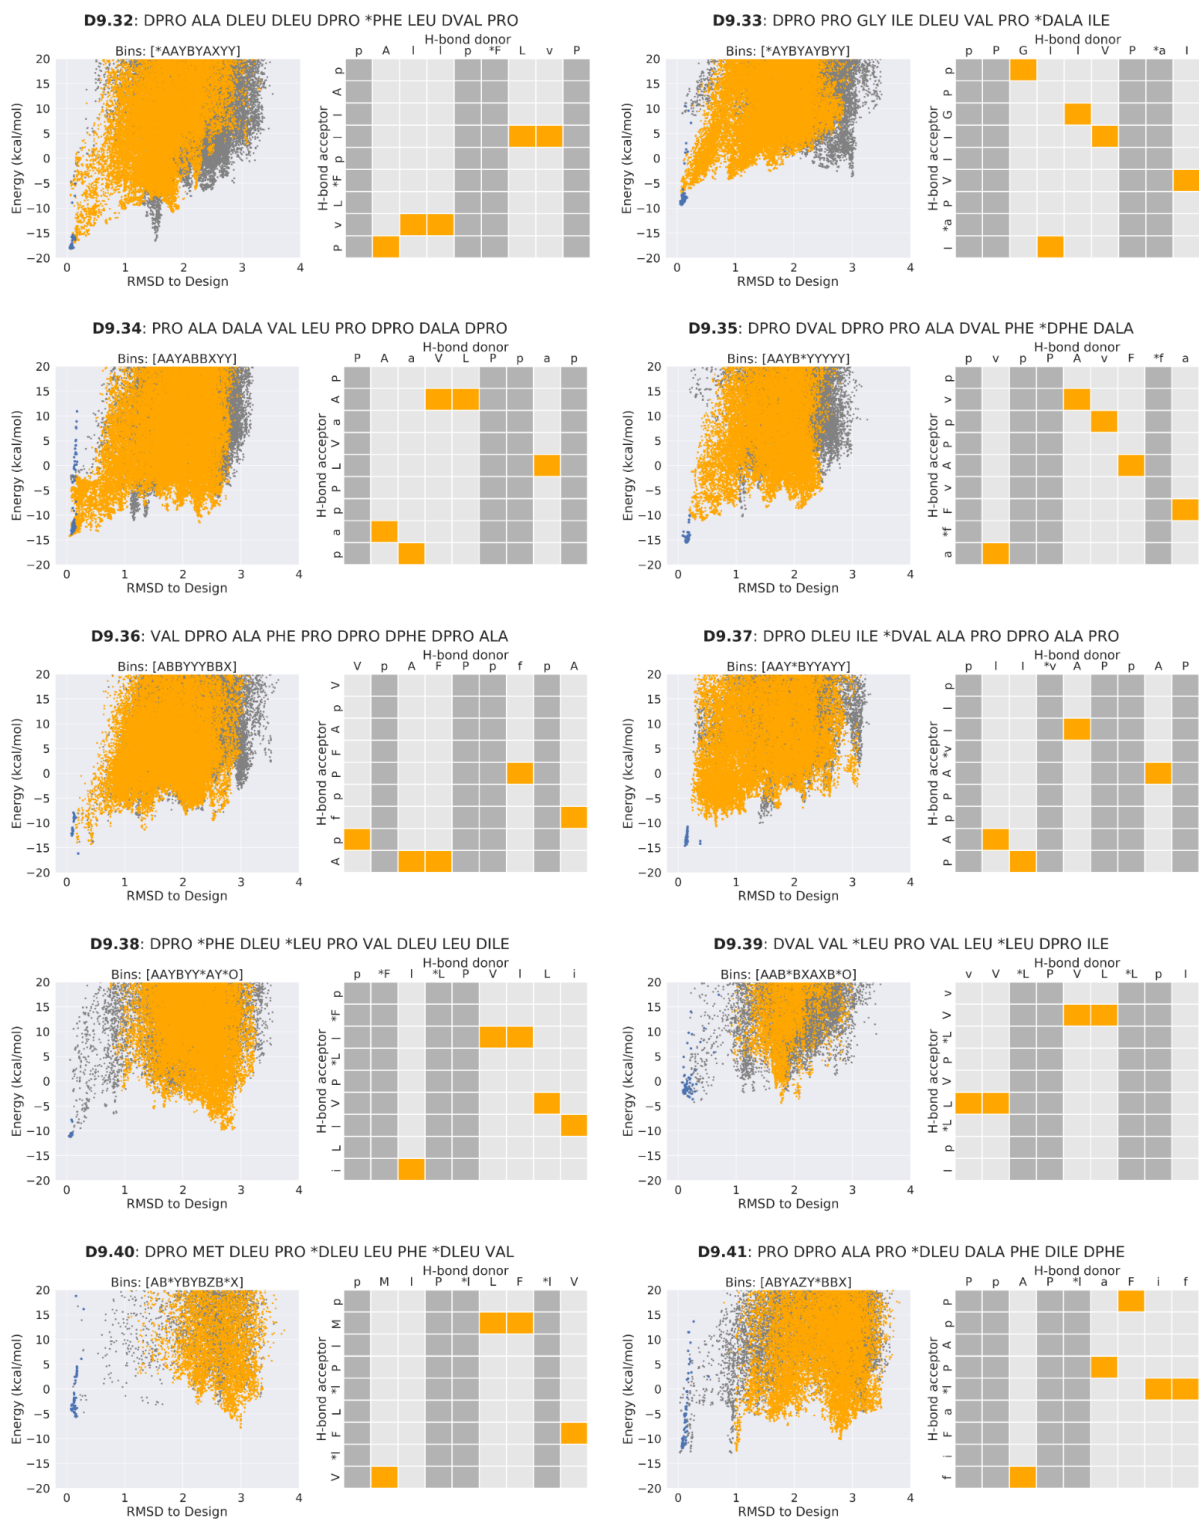

**Figure 1.4 (cont.): Structure-energy landscapes and hydrogen-bonding patterns for designed and selected 9-amino acid macrocycles. (full figure legend described earlier). Related to Figure 3.**

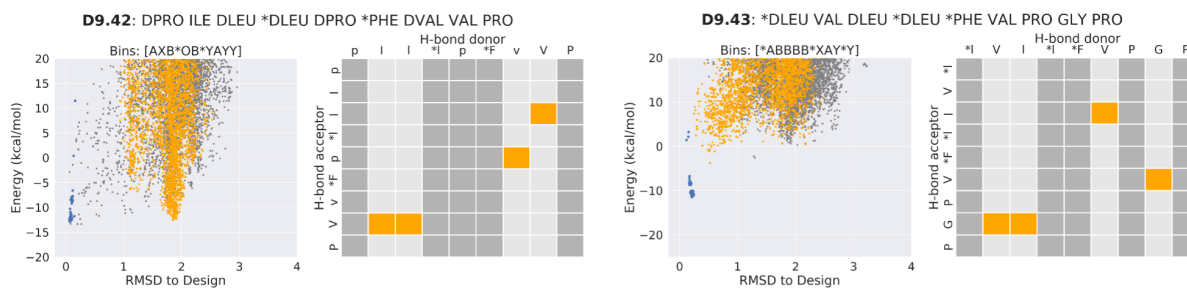

**Figure D1.5: Structure-energy landscapes and hydrogen-bonding patterns for designed and selected 10-amino acid macrocycles:** Left panels show the torsion bin cluster and predicted conformational landscape for each design. \* denotes N-methylated amino acids. Orange points denote an independently predicted structure with no cis-peptide bonds. Grey points represent predicted structures with at least one cis-peptide bond. Blue dots represent the local minimization of the designed macrocycle structure. For hydrogen bonding graphs, the orange boxes highlight the designed intramolecular hydrogen bonds. Amino acids without a backbone hydrogen bond donor (proline, D-proline, N-methylated amino acids) are marked by darker grey columns. Related to Figure 3.

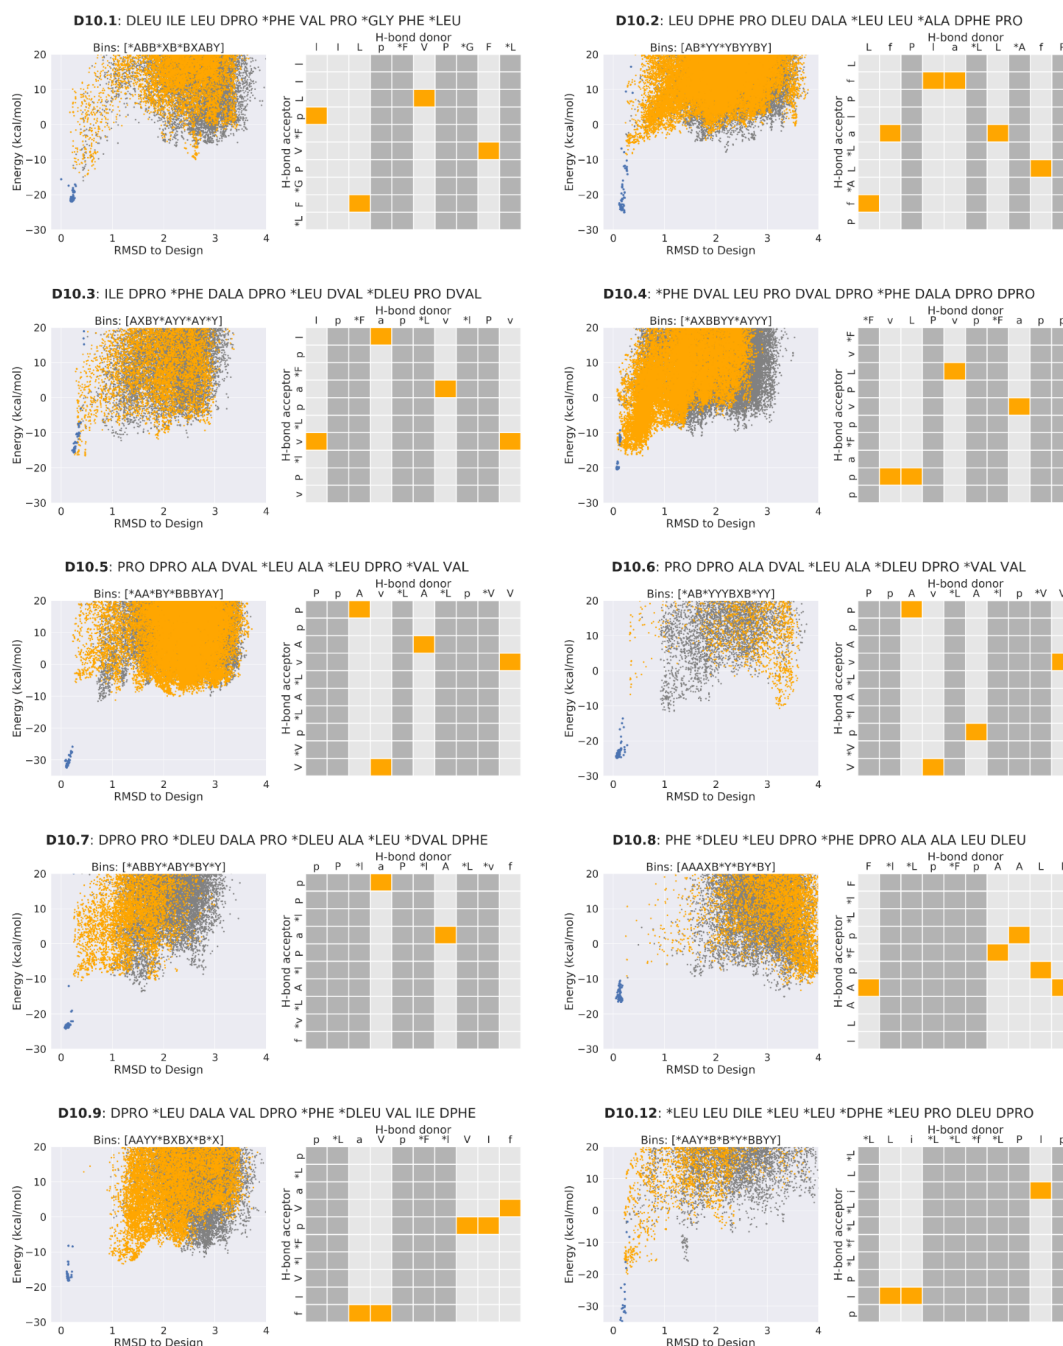

**Figure D1.5 (cont.): Structure-energy landscapes and hydrogen-bonding patterns for designed and selected 10-amino acid macrocycles. (full figure legend described earlier). Related to Figure 3.**

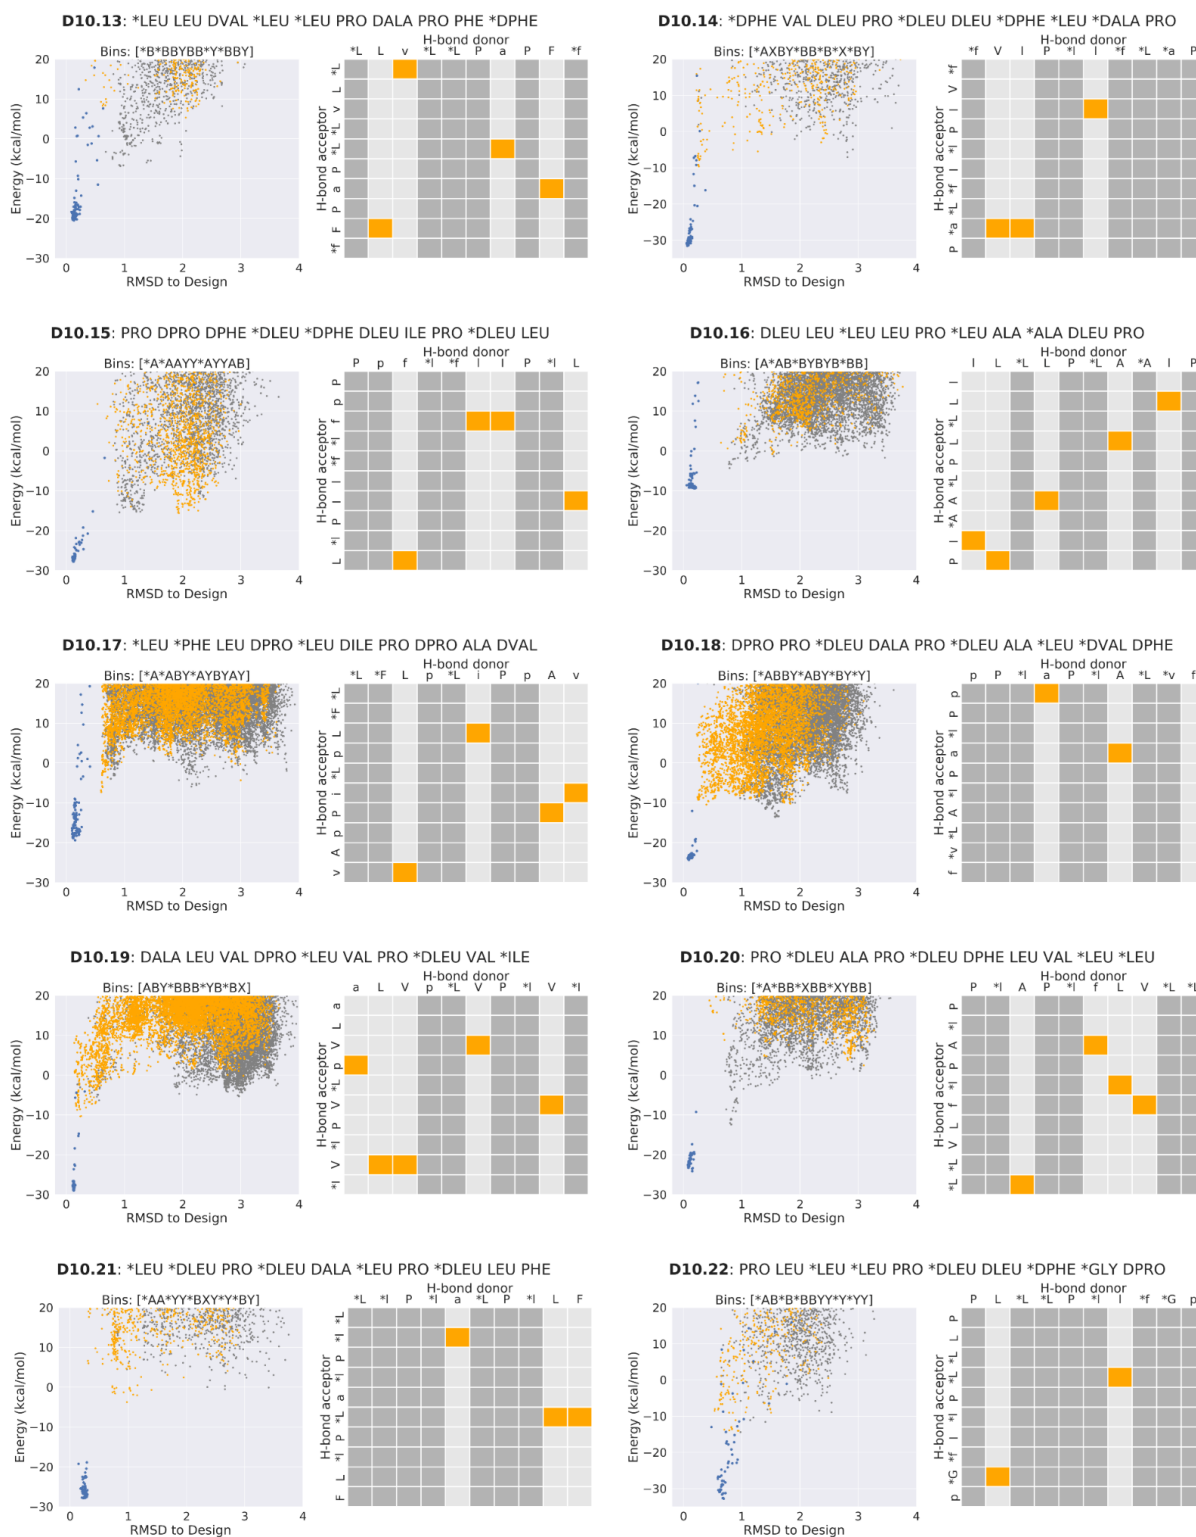

**Figure D1.5 (cont.): Structure-energy landscapes and hydrogen-bonding patterns for designed and selected 10-amino acid macrocycles. (full figure legend described earlier). Related to Figure 3.**

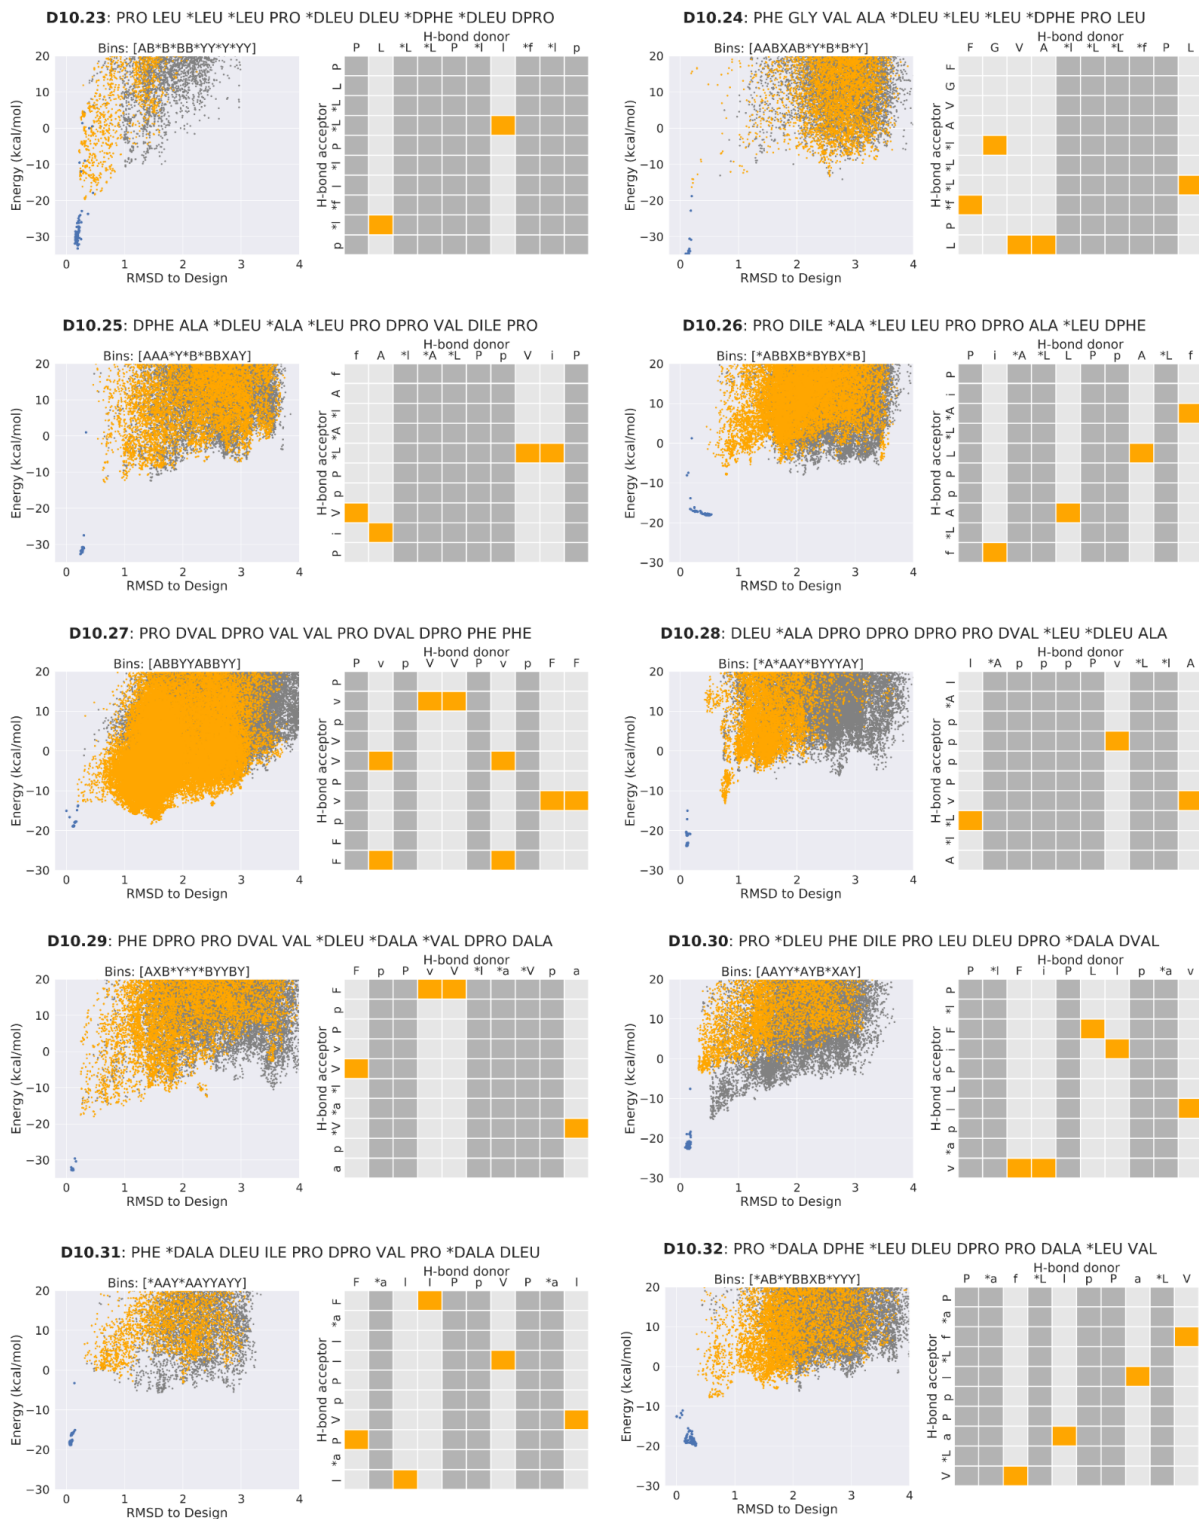

**Figure D1.5 (cont.): Structure-energy landscapes and hydrogen-bonding patterns for designed and selected 10-amino acid macrocycles. (full figure legend described earlier). Related to Figure 3.**

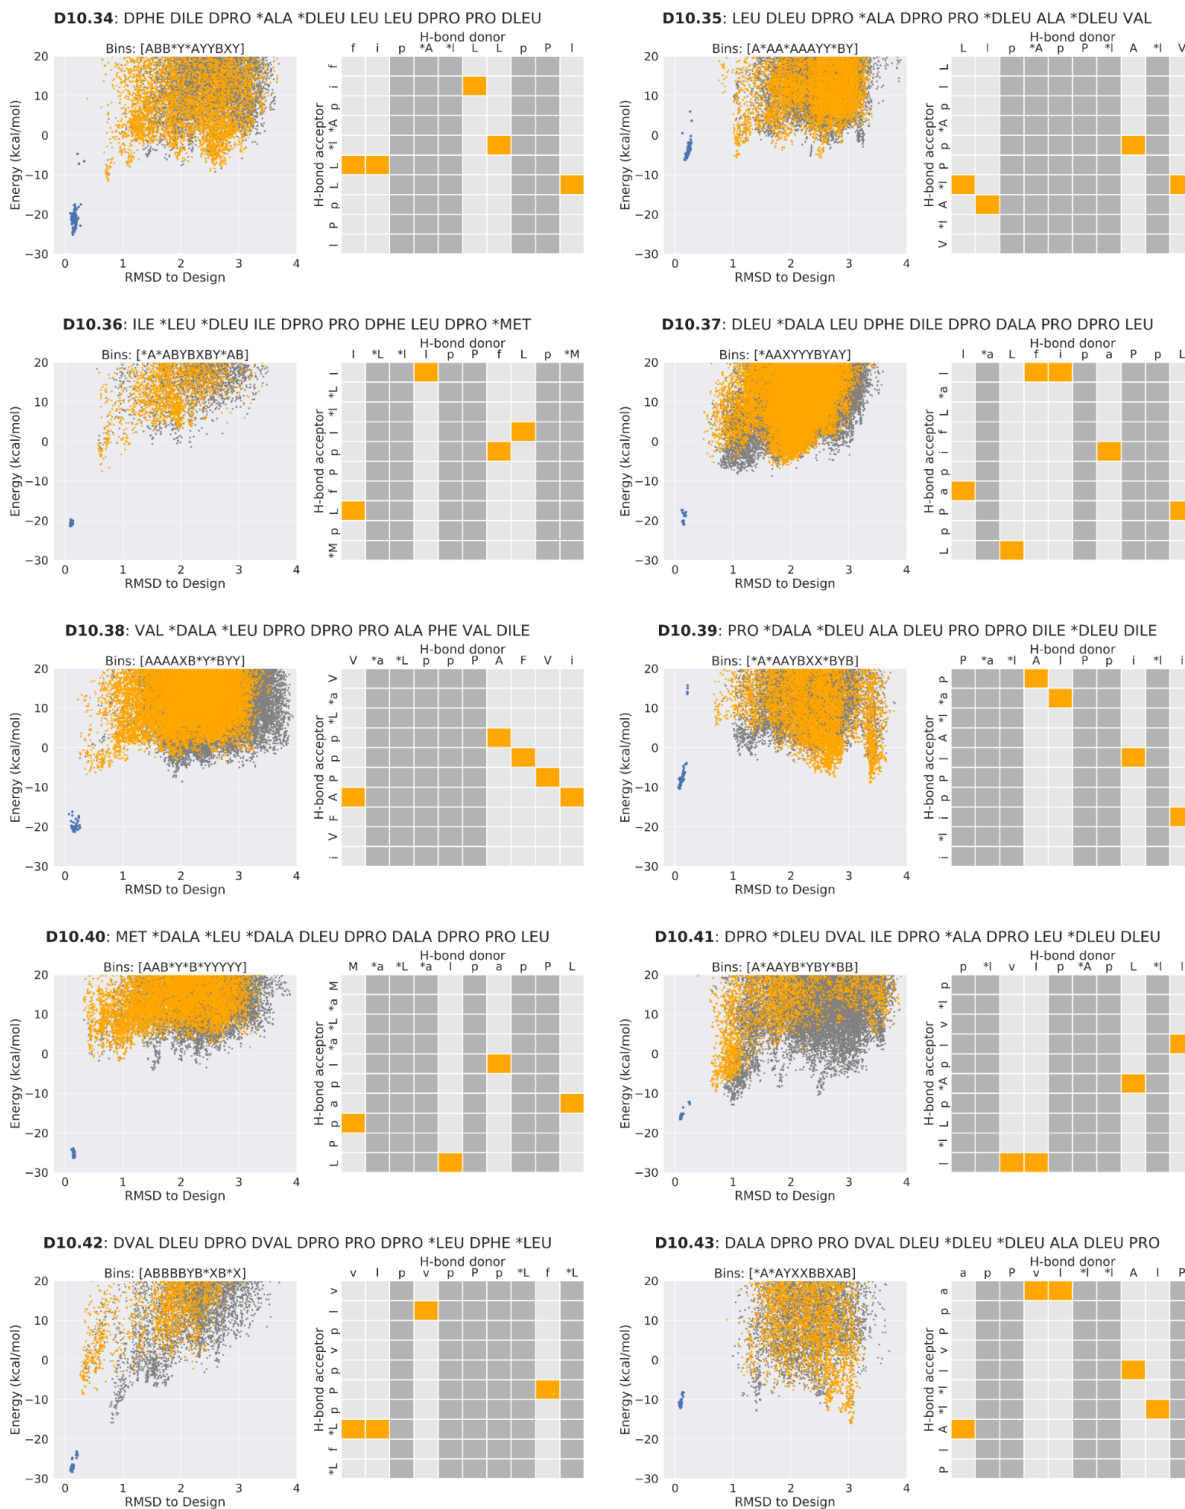



**Figure D1.5 (cont.): Structure-energy landscapes and hydrogen-bonding patterns for designed and selected 10-amino acid macrocycles. (full figure legend described earlier). Related to Figure 3.**

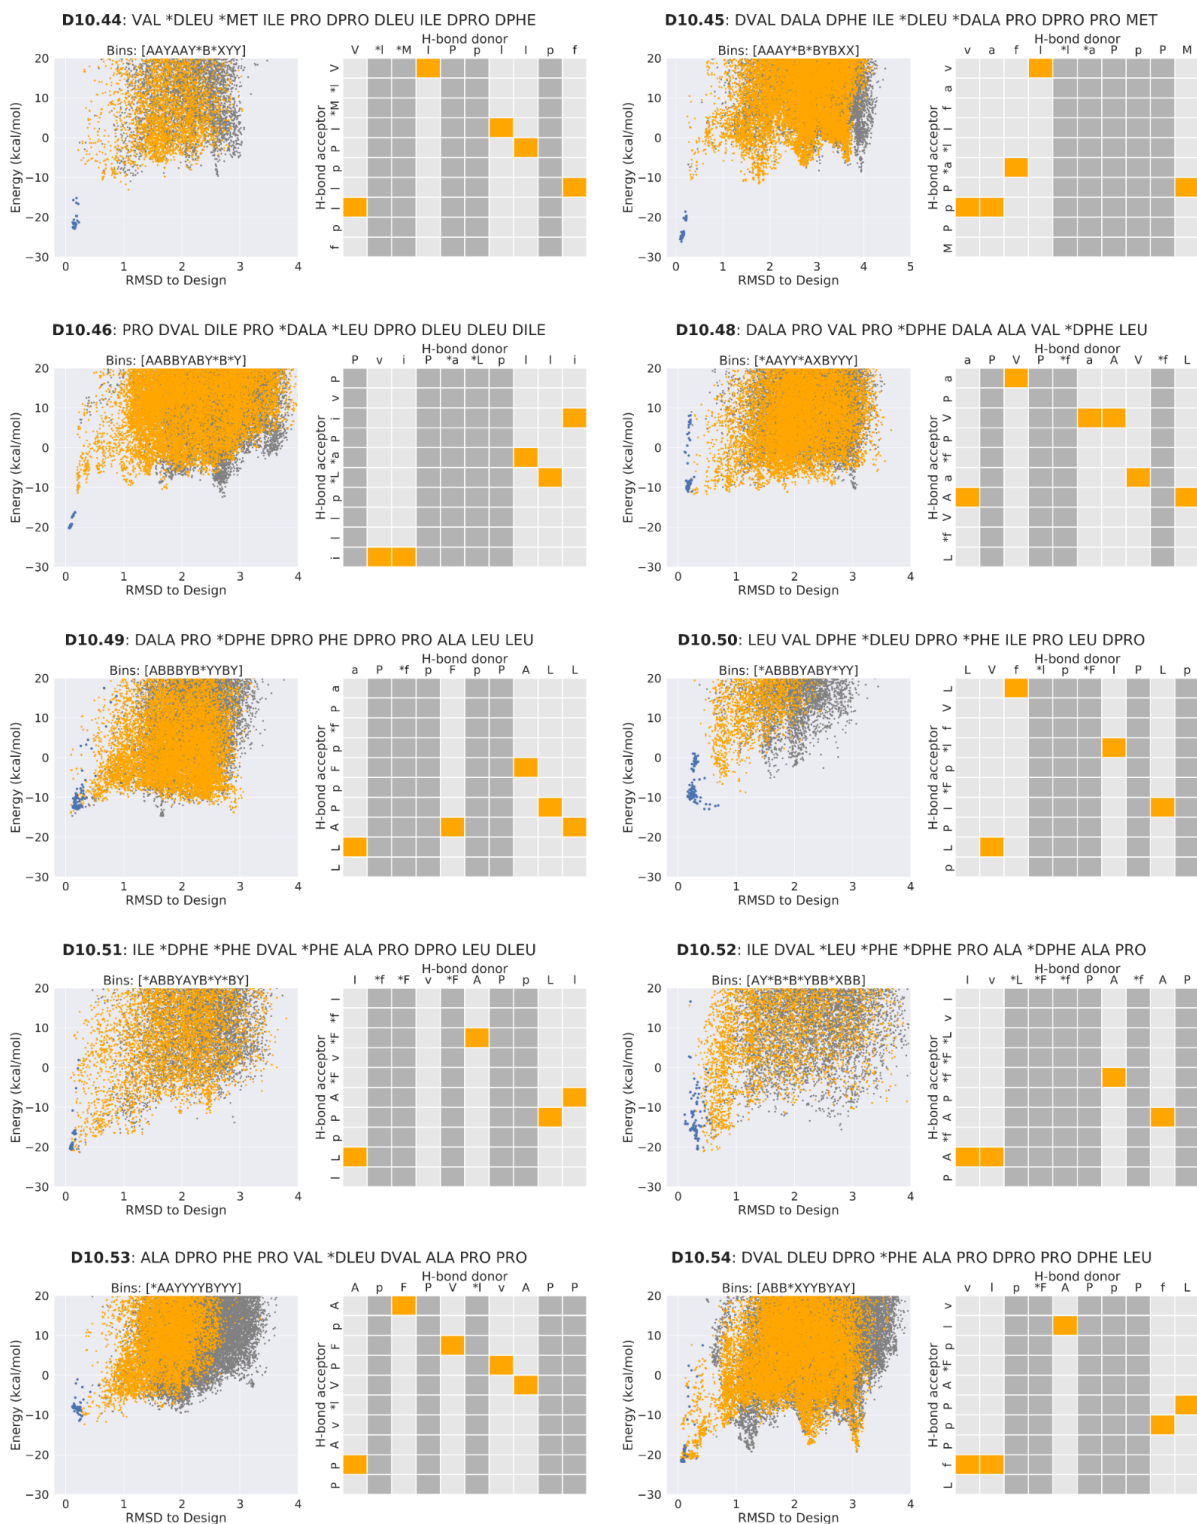

**Figure D1.5 (cont.): Structure-energy landscapes and hydrogen-bonding patterns for designed and selected 10-amino acid macrocycles. (full figure legend described earlier). Related to Figure 3.**

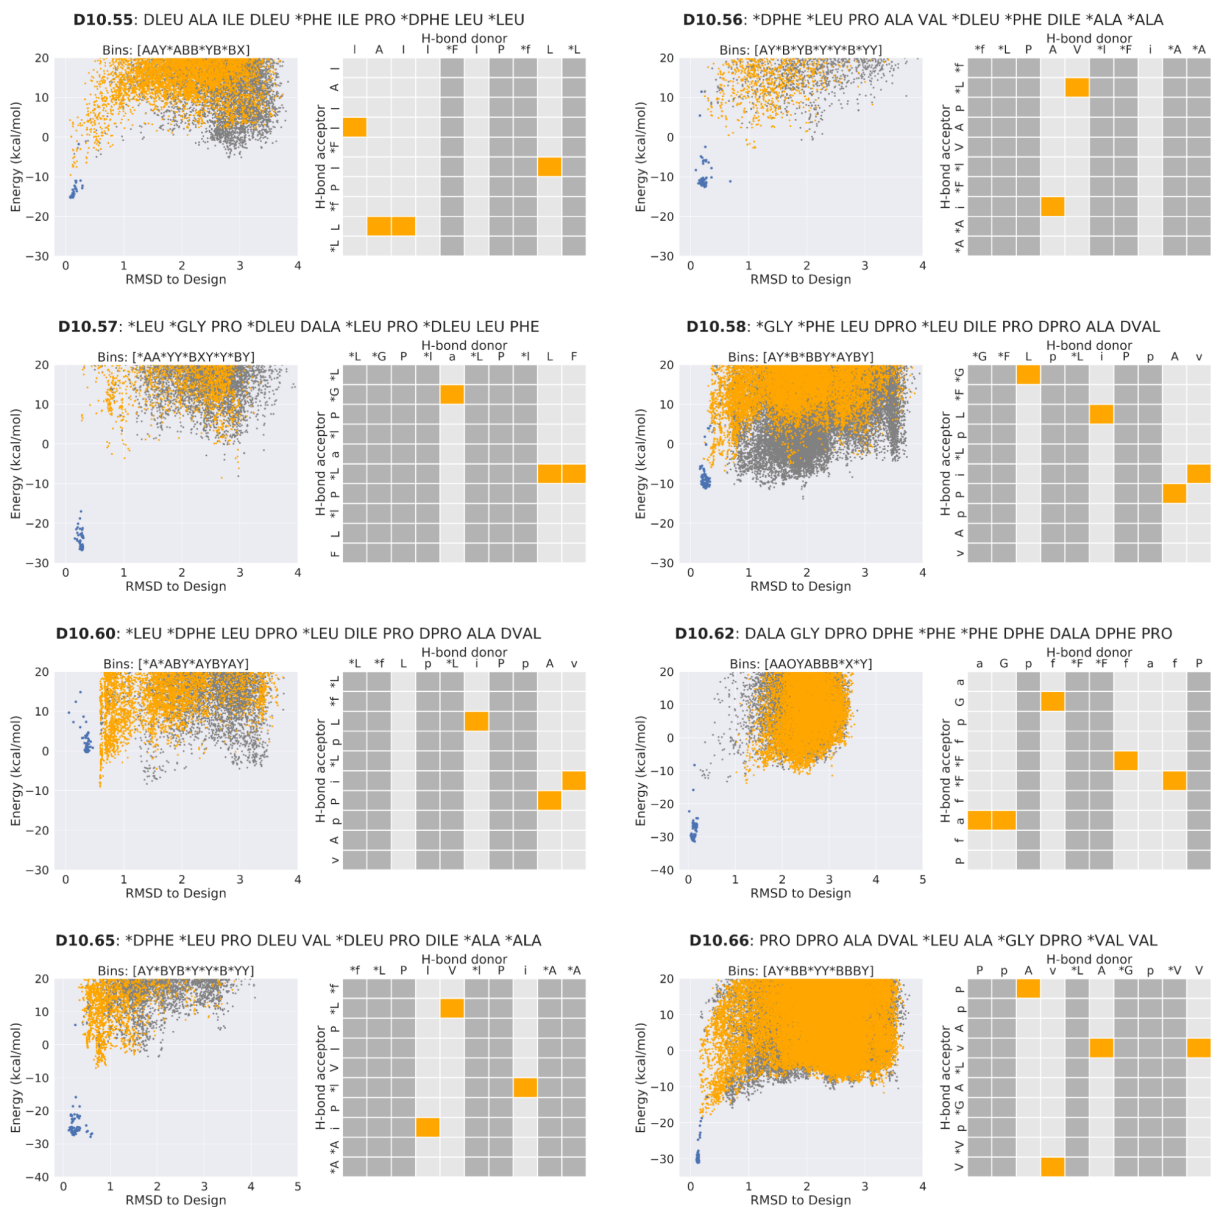

**Figure 1.6: Structure-energy landscapes and hydrogen-bonding patterns for designed and selected 11-amino acid macrocycles:** Left panels show the torsion bin cluster and predicted conformational landscape for each design. \* denotes N-methylated amino acids. Orange points denote an independently predicted structure with no cis-peptide bonds. Grey points represent predicted structures with at least one cis-peptide bond. Blue dots represent the local minimization of the designed macrocycle structure. For hydrogen bonding graphs, the orange boxes highlight the designed intramolecular hydrogen bonds. Amino acids without a backbone hydrogen bond donor (proline, D-proline, N-methylated amino acids) are marked by darker grey columns. Related to Figure 3.

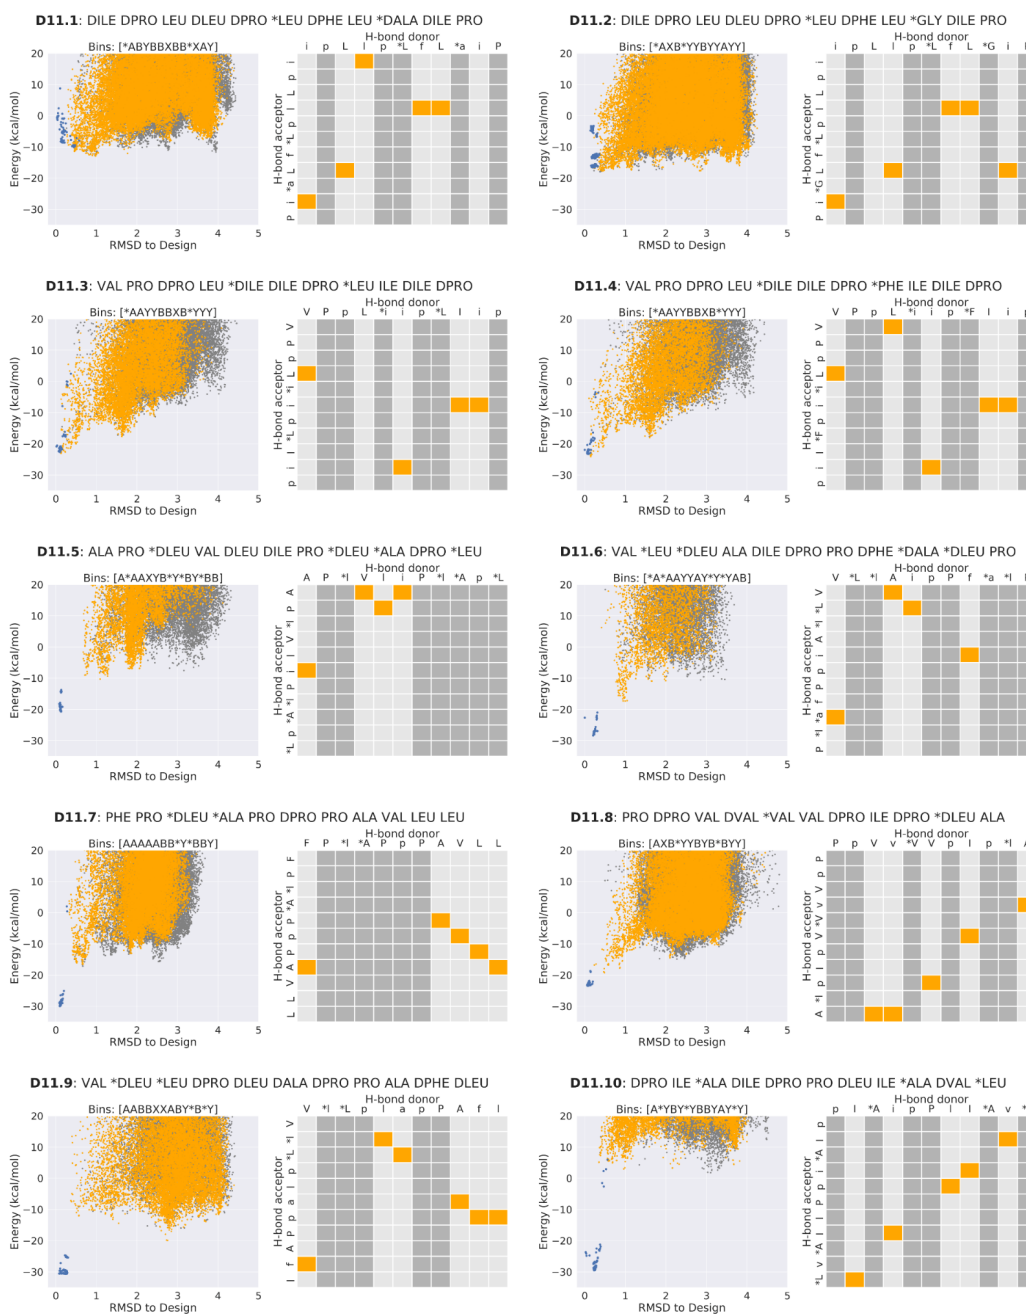

**Figure D1.6 (cont.): Structure-energy landscapes and hydrogen-bonding patterns for designed and selected 11-amino acid macrocycles. (full figure legend described earlier). Related to Figure 3.**

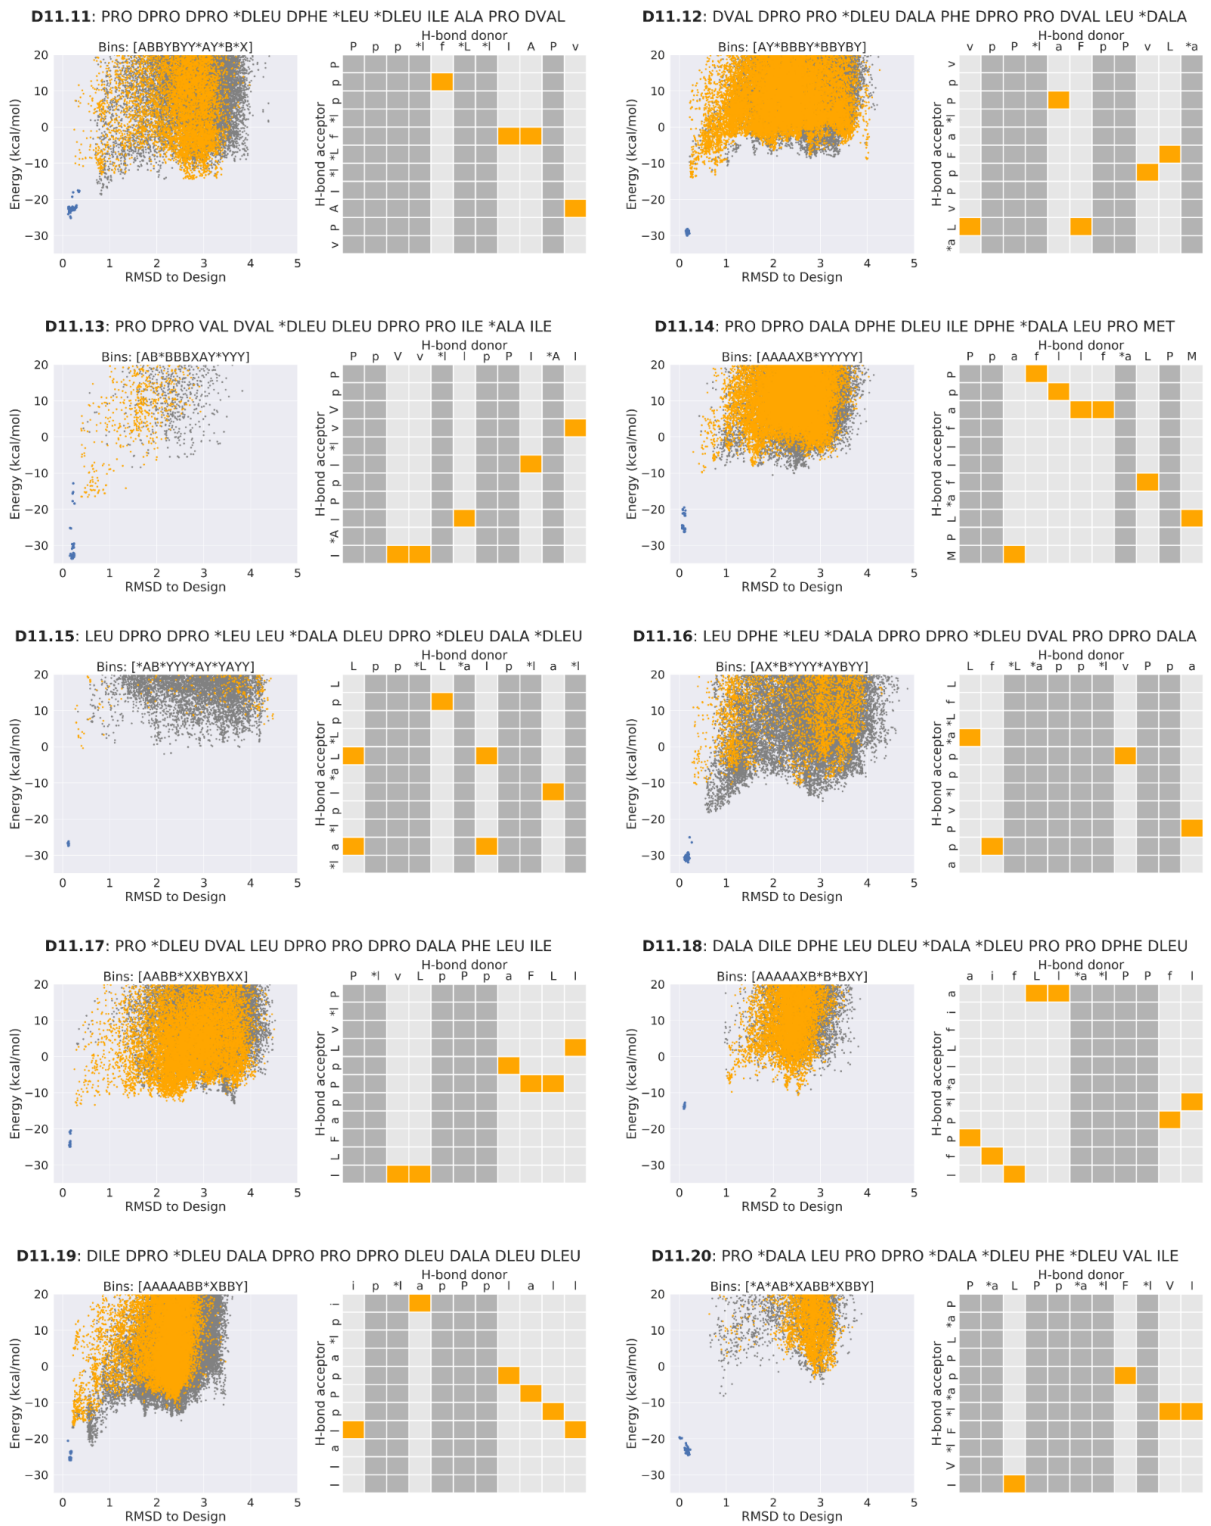



**Figure S1.7: Structure-energy landscapes and hydrogen-bonding patterns for designed and selected 12-amino acid macrocycles:** Left panels show the torsion bin cluster and predicted conformational landscape for each design. \* denotes N-methylated amino acids. Orange points denote an independently predicted structure with no cis-peptide bonds. Grey points represent predicted structures with at least one cis-peptide bond. Blue dots represent the local minimization of the designed macrocycle structure. For hydrogen bonding graphs, the orange boxes highlight the designed intramolecular hydrogen bonds. Amino acids without a backbone hydrogen bond donor (proline, D-proline, N-methylated amino acids) are marked by darker grey columns. Related to Figure 3.

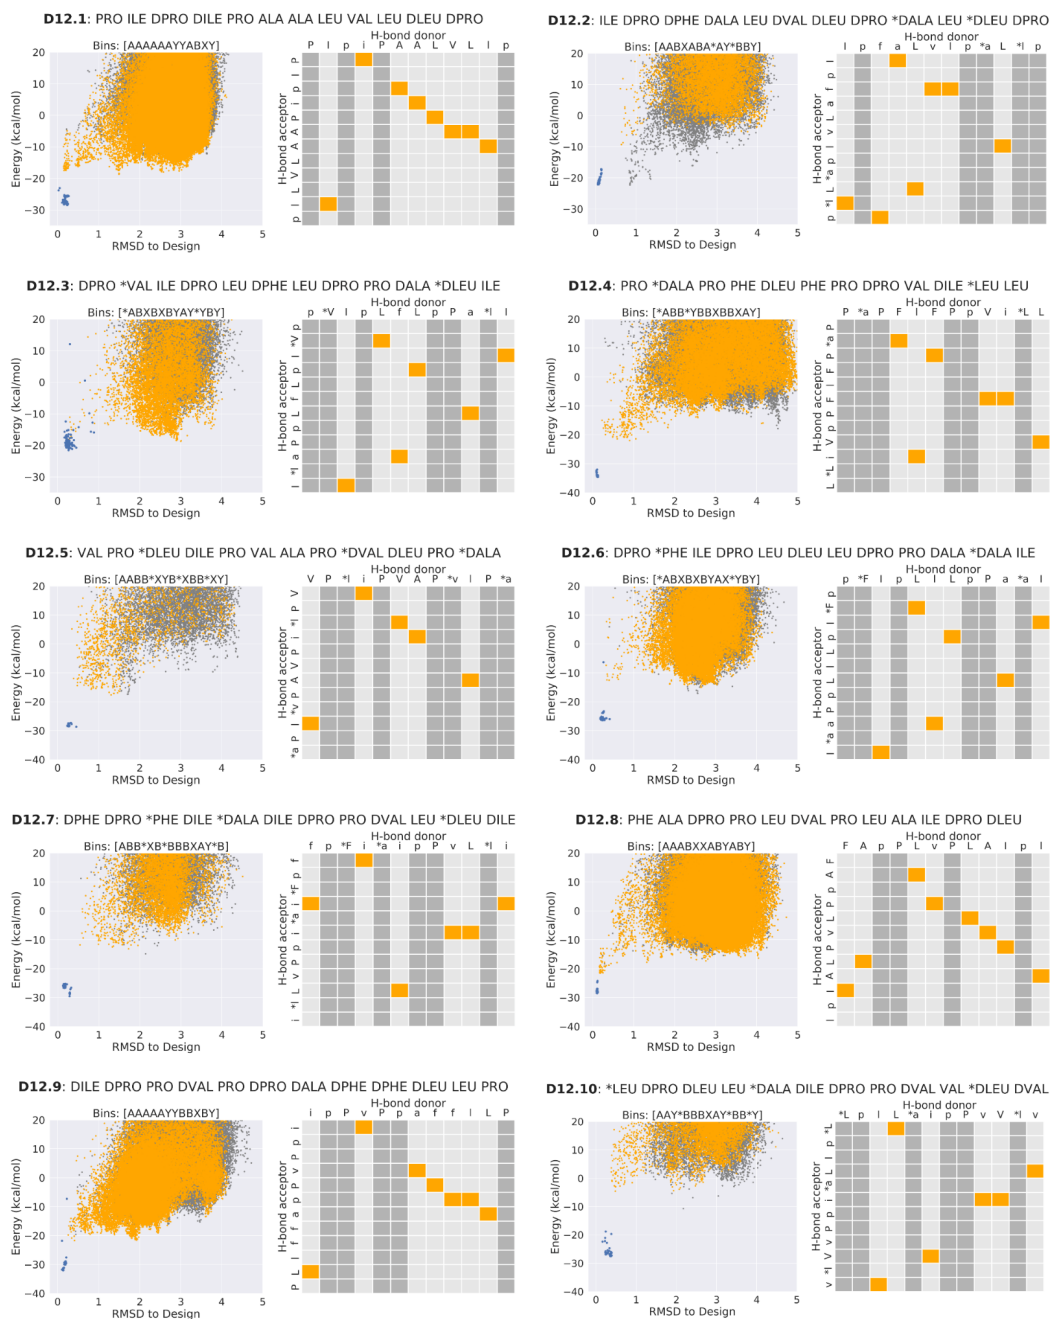

Supplement: mmc5.pdf [file mmc5.pdf]
