# Supplementary material for: Accurate de novo design of membrane-traversing macrocycles
Source: PubMed Central journal article supplement (PMC9490236; doi:10.1016/j.cell.2022.07.019), 2022-09-15
Supplement: mmc2.pdf [file mmc2.pdf]

**Table S2: RMSD between the designed models and X-ray crystal structures of the 9-11 residue macrocycles. Related to Figure 3.**

| <b>Design Name</b> | <b>RMSD (CA only)<br/>(Å)</b> | <b>RMSD backbone<br/>(C+N+CA+O+CN) (Å)</b> | <b>RMSD All Heavy atoms<br/>(Å)</b> |
|--------------------|-------------------------------|--------------------------------------------|-------------------------------------|
| <b>D9.1</b>        | 2.36                          | 2                                          | 3.03                                |
| <b>D9.8</b>        | 0.39                          | 0.33                                       | 0.88                                |
| <b>D9.24</b>       | 0.89                          | 1.2                                        | 2.1                                 |
| <b>D9.29</b>       | 0.78                          | 1.11                                       | 1.66                                |
| <b>D9.30</b>       | 2.54                          | 2.49                                       | 4.07                                |
| <b>D9.30_LE0*</b>  | 0.78                          | 0.78                                       | 1.47                                |
| <b>D10.1</b>       | 0.27                          | 0.27                                       | 0.47                                |
| <b>D10.21</b>      | 0.38                          | 0.9                                        | 1.19                                |
| <b>D10.22</b>      | 0.75                          | 0.82                                       | 1.58                                |
| <b>D10.23</b>      | 0.38                          | 0.41                                       | 1.28                                |
| <b>D10.31</b>      | 0.47                          | 0.45                                       | 0.84                                |
| <b>D10.65</b>      | 1.74                          | 1.67                                       | 2.47                                |
| <b>D11.1</b>       | 0.43                          | 0.43                                       | 1.11                                |
| <b>D11.3</b>       | 0.4                           | 0.43                                       | 0.93                                |
| <b>D11.4</b>       | 0.51                          | 0.54                                       | 0.93                                |
| <b>D11.25</b>      | 0.63                          | 0.87                                       | 1.47                                |

\*Structure prediction runs for D9.30 identified conformation LE0 with lower energy than the design model. For more details, please see the methods section on computational design of structured membrane-permeable peptides.
