# Supplementary material for: Accurate de novo design of membrane-traversing macrocycles
Source: PubMed Central journal article supplement (PMC9490236; doi:10.1016/j.cell.2022.07.019), 2022-09-15
Supplement: mmc3.pdf [file mmc3.pdf]

**Table S3: NMR chemical shift assignments for peptides D9.16, D8.21, and D8.31. Related to Figure 4.**

D9.16 (trans-cis) in  $d_6$ -DMSO resonance assignments. Proton chemical shifts are given in parentheses.

| res. | N / CH3      | C | C <sup>α</sup> | C <sup>β</sup>    | other                                                                                      |
|------|--------------|---|----------------|-------------------|--------------------------------------------------------------------------------------------|
| P1   |              |   | 56.8 (4.72)    | 29.6 (2.14, 1.85) | C <sup>γ</sup> , 25.7 (1.98, 2.14); C <sup>δ</sup> , 47.5 (3.72, 3.58)                     |
| *A2  | 32.0 (3.09)  |   | 49.9 (4.81)    | 14.1 (1.36)       |                                                                                            |
| A3   | 117.0 (7.65) |   | 50.3 (4.07)    | 16.8 (1.27)       |                                                                                            |
| V4   | 116.7 (6.78) |   | 55.0 (4.20)    | 29.9 (1.97)       | C <sup>γ1</sup> , 19.3 (0.88); C <sup>γ2</sup> , 18.8 (0.81)                               |
| *L5  | 30.9 (3.01)  |   | 54.3 (5.16)    | 35.7 (1.60, 1.60) | C <sup>γ</sup> , 24.6 (1.31); C <sup>δ1</sup> , 21.2 (0.76); C <sup>δ2</sup> , 23.8 (0.9)  |
| L6   | 114.1 (6.41) |   | 49.5 (4.48)    | 41.9 (1.41, 1.48) | C <sup>γ</sup> , 24.8 (1.60); C <sup>δ1</sup> , 21.9 (0.91); C <sup>δ2</sup> , 24.0 (0.9)  |
| L7   | 120.0 (8.41) |   | 51.7 (3.90)    | 37.5 (1.32, 1.51) | C <sup>γ</sup> , 24.6 (1.77); C <sup>δ1</sup> , 20.0 (0.78); C <sup>δ2</sup> , 23.7 (0.92) |
| cP8  |              |   | 60.5 (4.22)    | 32.1 (2.28, 2.02) | C <sup>γ</sup> , 22.0 (1.42, 1.78); C <sup>δ</sup> , 47.0 (3.20, 3.29)                     |
| L9   | 121.2 (7.95) |   | 53.8 (4.82)    | 37.1 (1.27, 1.95) | C <sup>γ</sup> , 25.9 (1.34); C <sup>δ1</sup> , 22.7 (0.74); C <sup>δ2</sup> , 21.4 (0.86) |

D9.16 in CDCl<sub>3</sub>; conformation 1-9 is trans-Pro 8 (trans-trans) and 21-29 is cis Pro 8 (trans-cis). Pro 1 & 21 are trans.

| res. | N / CH3      | C     | C <sup>α</sup> | C <sup>β</sup>    | other                                                                                       |
|------|--------------|-------|----------------|-------------------|---------------------------------------------------------------------------------------------|
| tP1  |              | 171.9 | 57.2 (4.57)    | 28.0 (1.79, 2.23) | C <sup>γ</sup> , 25.4 (2.01, 2.17); C <sup>δ</sup> , 47.0 (3.74, 3.62)                      |
| *A2  |              | 171.1 | 52.8 (5.38)    | 13.2 (1.29)       |                                                                                             |
| A3   | 122.4 (8.41) | 174.3 | 48.0 (4.83)    | 17.4 (1.32)       |                                                                                             |
| V4   | 120.8 (6.71) | 174.7 | 57.1 (4.15)    | 29.8 (2.04)       | C <sup>γ1</sup> , 18.0 (0.98); C <sup>γ2</sup> , 19.9 (1.06)                                |
| *L5  |              | 171.2 | 56.0 (5.55)    | 36.3 (2.04, 1.64) | C <sup>γ</sup> , 24.9 (1.43); C <sup>δ1</sup> , 20.9 (0.93); C <sup>δ2</sup> , 23.7 (0.97); |
| L6   | 114.8 (7.46) | 173.6 | 53.9 (4.34)    | 40.0 (1.97, 1.67) | C <sup>γ</sup> , 25.3 (1.83); C <sup>δ1</sup> , 20.6 (0.91); C <sup>δ2</sup> , 23.4 (0.98)  |
| L7   | 112.8 (7.20) |       | 48.9 (4.74)    | 42.9 (1.61, 1.14) | C <sup>γ</sup> , 24.6 (1.52); C <sup>δ1</sup> , 21.20 (1.00); C <sup>δ2</sup> , 23.8 (0.81) |
| tP8  |              | 171.0 | 58.8 (4.74)    | 25.3 (2.45, 1.79) | C <sup>γ</sup> , 25.3 (2.10, 2.01); C <sup>δ</sup> , 46.9 (3.50, 3.39)                      |
| L9   | 123.1 (8.04) |       | 49.7 (4.72)    | 40.7 (1.65, 1.51) | C <sup>γ</sup> , 24.9 (1.73); C <sup>δ1</sup> , 21.2 (1.00); C <sup>δ2</sup> , 23.4 (0.95)  |
| P21  |              | 174.2 | 56.9 (4.58)    | 29.6 (2.14, 2.09) | C <sup>γ</sup> , 25.7 (2.25, 2.02); C <sup>δ</sup> , 47.2 (3.81, 3.76)                      |
| *A22 |              | 171.1 | 54.2 (5.03)    | 14.1 (1.50)       |                                                                                             |
| A23  | 118.6 (7.69) | 174.0 | 49.6 (4.47)    | 16.3 (1.40)       |                                                                                             |
| V24  | 120.0 (6.90) | 173.6 | 56.4 (4.16)    | 29.7 (2.18)       | C <sup>γ1</sup> , 18.9 (0.90); C <sup>γ2</sup> , 19.6 (1.00)                                |
| *L25 |              | 170.7 | 55.3 (5.36)    | 35.8 (1.87, 1.63) | C <sup>γ</sup> , 24.8 (1.38); C <sup>δ1</sup> , 20.0 (0.85); C <sup>δ2</sup> , 23.6 (0.93)  |
| L26  | 116.3 (6.93) |       | 50.4 (4.58)    | 41.1 (1.51, 1.87) | C <sup>γ</sup> , 25.0 (1.70); C <sup>δ1</sup> , 21.3 (0.96); C <sup>δ2</sup> , 23.4 (0.98)  |
| L27  | * (5.82)     |       | 51.8 (4.11)    | 38.7 (1.69, 1.26) | C <sup>γ</sup> , 24.7 (1.78); C <sup>δ1</sup> , 20.4 (0.86); C <sup>δ2</sup> , 23.4 (0.98)  |
| cP28 |              | 170.4 | 60.7 (4.28)    | 31.7 (2.60, 2.00) | C <sup>γ</sup> , 22.0 (1.88, 1.67); C <sup>δ</sup> , 46.9 (3.51, 3.38)                      |
| L29  | 123.7 (8.15) | 172.5 | 50.5 (4.92)    | 36.9 (1.93, 1.49) | C <sup>γ</sup> , 26.0 (1.38); C <sup>δ1</sup> , 20.9 (0.93); C <sup>δ2</sup> , 22.5 (0.82)  |

D8.31 in CDCl<sub>3</sub> resonance assignments for conformation with symmetric cis-cis N-methyl Leu 3 and 7.

| res. | NH / CH3     | C     | C <sup>α</sup> | C <sup>β</sup>    | other                                                                                      |
|------|--------------|-------|----------------|-------------------|--------------------------------------------------------------------------------------------|
| dA1  | 118.1 (7.80) | 171.3 | 45.9 (5.01)    | 17.4 (1.27)       |                                                                                            |
| dP2  |              | 173.4 | 55.8 (4.60)    | 29.8 (2.08, 2.01) | C <sup>γ</sup> , 25.3 (2.36, 1.92); C <sup>δ</sup> , 47.9 (3.77, 3.63)                     |
| *dL3 | 30.0 (2.82)  | 169.8 | 59.7 (4.54)    | 36.9 (2.04, 1.69) | C <sup>γ</sup> , 24.4 (1.45); C <sup>δ1</sup> , 23.4 (0.98); C <sup>δ2</sup> , 21.7 (0.93) |
| dV4  | 113.3 (7.48) | 171.2 | 60.3 (4.39)    | 30.8 (2.14)       | C <sup>γ1</sup> , 18.1 (0.93); C <sup>γ2</sup> , 19.5 (0.97)                               |

D8.31 in  $d_6$ -DMSO; conformation 1-4 is symmetric cis-cis and 21-28 is cis-trans.

| res.    | N / CH3      | C     | C <sup>α</sup> | C <sup>β</sup>     | other                                                                                      |
|---------|--------------|-------|----------------|--------------------|--------------------------------------------------------------------------------------------|
| dA1     | 116.2 (7.57) | 170.5 | 46.1 (4.75)    | 17.5 (1.15)        |                                                                                            |
| dP2     |              |       | 56.0 (4.65)    | 29.6 (2.08, 1.80)  | C <sup>γ</sup> , 25.2 (2.16, 1.79); C <sup>δ</sup> , 47.5 (3.61, 3.43)                     |
| c-*dL3  | 29.7 (2.66)  | 167.0 | 59.2 (4.55)    | 36.8 (1.83, 1.64)  | C <sup>γ</sup> , 24.5 (1.40); C <sup>δ1</sup> , 23.7 (0.91); C <sup>δ2</sup> , 22.4 (0.89) |
| dV4     | 114.1 (7.63) | 170.6 | 60.6 (4.03)    | 30.4 (2.00)        | C <sup>γ1</sup> , 19.7 (0.88); C <sup>γ2</sup> , 18.9 (0.85)                               |
| dA21    | 114.1 (7.36) |       | 47.6 (4.60)    | 17.0 (1.17)        |                                                                                            |
| dP22    |              |       | 56.5 (4.82)    | 29.2 (2.06, 1.73)  | C <sup>γ</sup> , 25.3 (2.13, 1.89); C <sup>δ</sup> , 47.3 (3.59, 3.45)                     |
| c-*L23  | 29.3 (2.60)  | 169.8 | 59.0 (4.70)    | 36.3 (1.81, 1.63)  | C <sup>γ</sup> , 24.4 (1.32); C <sup>δ1</sup> , 24.0 (0.91); C <sup>δ2</sup> , 22.5 (0.89) |
| dV24    | 115.6 (8.43) |       | 61.0 (4.01)    | 30.6 (2.03)        | C <sup>γ1</sup> , 19.6 (0.85); C <sup>γ2</sup> , 19.2 (0.86)                               |
| dA25    | 117.3 (7.35) |       | 46.1 (4.76)    | 18.2 (1.13)        |                                                                                            |
| dP26    |              |       | 57.6 (4.61)    | 29.12 (2.22, 1.76) | C <sup>γ</sup> , 25.3 (2.06, 1.89); C <sup>δ</sup> , 48.1 (3.67, 3.67);                    |
| t-*dL27 | 40.9 (3.22)  |       | 68.4 (3.70)    | 38.3 (2.22, 1.66)  | C <sup>γ</sup> , 25.3 (1.42); C <sup>δ1</sup> , 23.5 (0.87); C <sup>δ2</sup> , 22.1 (0.88) |
| dV28    | 112.3 (7.96) | 170.8 | 60.2 (4.01)    | 31.3 (1.84)        | C <sup>γ1</sup> , 19.5 (0.84); C <sup>γ2</sup> , 18.4 (0.77)                               |

D8.21 in d<sub>6</sub>-DMSO resonance assignments for symmetric trans-trans conformation for D-Pro 3 & 7

| res. | N / CH3      | C     | C <sup>α</sup> | C <sup>β</sup>    | other                                                                                      |
|------|--------------|-------|----------------|-------------------|--------------------------------------------------------------------------------------------|
| dV1  | 121.0 (8.57) | 172.0 | 54.8 (4.34)    | 30.3 (2.00)       | C <sup>γ1</sup> , 19.2 (0.86); C <sup>γ2</sup> , 19.1 (0.89)                               |
| *L2  | 30.9 (3.01)  | 170.8 | 52.6 (5.35)    | 37.7 (1.52, 1.52) | C <sup>γ</sup> , 24.3 (1.39); C <sup>δ1</sup> , 23.9 (0.90); C <sup>δ2</sup> , 22.5 (0.87) |
| dP3  |              | 170.6 | 61.0 (4.31)    | 28.4 (2.01, 1.74) | C <sup>γ</sup> , 25.2 (1.69, 1.69); C <sup>δ</sup> , 47.3 (3.48, 3.02)                     |
| L4   | 113.4 (7.04) | 172.2 | 50.5 (4.54)    | 43.4 (1.36, 1.36) | C <sup>γ</sup> , 24.3 (1.58); C <sup>δ1</sup> , 23.6 (0.83); C <sup>δ2</sup> , 22.5 (0.87) |

D8.21 in 50:50 d<sub>6</sub>-DMSO/water resonance assignments. 1-4 are trans-trans and 21-24 are cis-cis conformation

| res.   | N / CH3       | C     | C <sup>α</sup> | C <sup>β</sup>    | other                                                                                      |
|--------|---------------|-------|----------------|-------------------|--------------------------------------------------------------------------------------------|
| dV1    | 116.7 (8.02)  | 173.6 | 55.4 (4.64)    | 31.0 (2.07)       | C <sup>γ1</sup> , 19.1 (0.9); C <sup>γ2</sup> , 17.4 (0.88)                                |
| *L2    | 31.3 (3.09)   |       | 53.6 (5.13)    | 36.1 (1.79, 1.49) | C <sup>γ</sup> , 24.7 (1.50); C <sup>δ1</sup> , 23.2 (0.95); C <sup>δ2</sup> , 21.4 (0.89) |
| dP3    |               |       | 60.9 (4.40)    | 29.5 (2.23, 1.92) | C <sup>γ</sup> , 24.5 (1.97, 1.9); C <sup>δ</sup> , 47.8 (3.71, 3.65)                      |
| L4     | 116.83 (7.30) |       | 51.7 (4.51)    | 41.3 (1.36, 1.36) | C <sup>γ</sup> , 24.8 (1.46); C <sup>δ1</sup> , 23.1 (0.82); C <sup>δ2</sup> , 21.1 (0.82) |
| dV21   | 120.7 (8.76)  | 171.5 | 54.5 (4.89)    | 31.5 (2.06)       | C <sup>γ1</sup> , 18.7 (0.85); C <sup>γ2</sup> , 18.7 (0.81)                               |
| *L22   | 30.6 (2.94)   |       | 52.6 (5.29)    | 38.0 (1.80, 1.25) | C <sup>γ</sup> , 24.5 (1.37); C <sup>δ1</sup> , 22.8 (0.84); C <sup>δ2</sup> , 22.7 (0.84) |
| c-dP23 |               |       | 59.6 (4.20)    | 33.2 (2.31, 2.03) | C <sup>γ</sup> , 22.2 (1.86, 1.64); C <sup>δ</sup> , 48.2 (3.53, 3.44)                     |
| L24    | 116.2 (8.33)  |       | 51.1 (4.59)    | 41.6 (1.84, 1.48) | C <sup>γ</sup> , 24.0 (1.46); C <sup>δ1</sup> , 23.6 (0.92); C <sup>δ2</sup> , 20.7 (0.87) |

D8.21 in CDCl<sub>3</sub> resonance assignments; 1-4 are trans-trans and 21-28 are cis-trans

| res. | N            | C     | C <sup>α</sup> | C <sup>β</sup>    | other                                                                                      |
|------|--------------|-------|----------------|-------------------|--------------------------------------------------------------------------------------------|
| dV1  | 114.4 (6.69) | 171.0 | 54.2 (4.72)    | 31.6 (2.01)       | C <sup>γ1</sup> , 17.5 (0.89); C <sup>γ2</sup> , 19.6 (0.97)                               |
| *L2  | 31.0 (3.13)  | 172.6 | 52.7 (5.31)    | 37.5 (1.70, 1.64) | C <sup>γ</sup> , 24.8 (1.46); C <sup>δ1</sup> , 22.3 (0.93); C <sup>δ2</sup> , 23.2 (0.97) |
| dP3  |              | 170.9 | 60.0 (4.64)    | 27.5 (1.95, 2.36) | C <sup>γ</sup> , 24.7 (2.03, 1.94); C <sup>δ</sup> , 47.3 (3.54, 3.63)                     |
| L4   | 118.7 (7.14) | 171.7 | 52.0 (4.38)    | 40.7 (1.50, 1.50) | C <sup>γ</sup> , 24.5 (1.61); C <sup>δ1</sup> , 21.7 (0.90); C <sup>δ2</sup> , 23.0 (0.91) |
| dV21 | 117.1 (7.37) | 168.1 | 55.8 (4.28)    | 29.3 (2.30)       | C <sup>γ1</sup> , 18.5 (1.00); C <sup>γ2</sup> , 19.6 (0.97)                               |
| *L22 | 30.6 (3.00)  | 172.0 | 53.4 (5.25)    | 38.3 (1.14, 2.00) | C <sup>γ</sup> , 24.7 (1.51); C <sup>δ1</sup> , 22.4 (0.87); C <sup>δ2</sup> , 23.2 (0.88) |
| dP23 |              | 171.9 | 58.7 (4.30)    | 33.7 (1.95, 2.4)  | C <sup>γ</sup> , 22.2 (1.77, 1.86); C <sup>δ</sup> , 47.8 (3.54, 3.73)                     |
| L24  | 112.4 (5.00) | 172.3 | 50.9 (4.87)    | 42.6 (1.37, 2.08) | C <sup>γ</sup> , 25.1 (1.47); C <sup>δ1</sup> , 21.0 (0.93); C <sup>δ2</sup> , 24.3 (0.92) |
| dV25 | 116.8 (8.65) | 176.7 | 56.7 (4.87)    | 31.5 (2.18)       | C <sup>γ1</sup> , 19.4 (0.89); C <sup>γ2</sup> , 19.0 (0.80)                               |
| *L26 | 32.2 (3.36)  |       | 55.4 (4.50)    | 36.7 (1.98, 1.39) | C <sup>γ</sup> , 25.6 (1.62); C <sup>δ1</sup> , 21.2 (0.96); C <sup>δ2</sup> , 23.5 (1.04) |
| dP27 |              | 171.3 | 60.1 (4.71)    | 27.7 (1.96, 2.57) | C <sup>γ</sup> , 24.2 (1.96, 2.09); C <sup>δ</sup> , 46.8 (3.48, 4.00)                     |
| L28  | 117.6 (7.41) | 174.0 | 52.2 (4.61)    | 43.1 (1.58, 1.18) | C <sup>γ</sup> , 24.8 (1.72); C <sup>δ1</sup> , 21.0 (0.93); C <sup>δ2</sup> , * (0.94)    |
