# Supplementary material for: Accurate de novo design of membrane-traversing macrocycles
Source: PubMed Central journal article supplement (PMC9490236; doi:10.1016/j.cell.2022.07.019), 2022-09-15
Supplement: mmc4.pdf [file mmc4.pdf]

**Table S4. NMR validation tables for designs D9.16, D8.31, and D8.21. RMSD calculated for 20 lowest energy structures out of 100. Related to Figure 4.**

|                                    | D9.16       | D9.16       | D9.16       | D8.31       | D8.31       | D8.31       |
|------------------------------------|-------------|-------------|-------------|-------------|-------------|-------------|
|                                    | DMSO        | CDCI3       | CDCI3       | CDCI3       | DMSO        | DMSO        |
|                                    | trans-cis   | trans-cis   | trans-trans | cis-cis     | cis-cis     | cis-trans   |
| <b>NMR restraints</b>              |             |             |             |             |             |             |
| Total NOEs                         | 106         | 89          | 99          | 111         | 84          | 82          |
| Intra-residue                      | 38          | 35          | 41          | 38          | 26          | 24          |
| Sequential  i-j =1                 | 48          | 31          | 38          | 59          | 48          | 47          |
| Medium 1< i-j <5                   | 20          | 23          | 20          | 14          | 10          | 11          |
| Long  i-j >=5                      | 0           | 0           | 0           | 73          | 0           | 0           |
| Hydrogen bonds                     | 0           | 0           | 0           | 0           | 0           | 0           |
| PHI dihedral restraints            | 5           | 5           | 5           | 4           | 4           | 4           |
| <b>Structure Statistics</b>        |             |             |             |             |             |             |
| <i>Violations (mean and s.d.)</i>  |             |             |             |             |             |             |
| Max. distance restraint (Å)        | 0.10        | 0.14        | 0.41        | 0.35        | 0.07        | 0.74        |
| Ave. distance restraints viol. (Å) | 0.02 ± 0.02 | 0.03 ± 0.03 | 0.07 ± 0.10 | 0.19 ± 0.15 | 0.02 ± 0.02 | 0.09 ± 0.15 |
| Max. dihedral angle (°)            | 2.53        | 2.45        | 1.18        | 1.26        | 0.30        | 3.68        |
| Ave. dihedral viol (°)             | 0.86 ± 0.73 | 0.78 ± 0.67 | 0.36 ± 0.26 | 1.18 ± 0.06 | 0.19 ± 0.07 | 1.27 ± 1.19 |
| <b>Average pairwise RMSD</b>       |             |             |             |             |             |             |
| backbone (Å)                       | 0.21 ± 0.07 | 0.24 ± 0.09 | 0.20 ± 0.05 | 0.21 ± 0.10 | 0.14 ± 0.12 | 0.48 ± 0.09 |
| heavy (Å)                          | 0.53 ± 0.08 | 0.68 ± 0.12 | 0.73 ± 0.07 | 0.52 ± 0.22 | 0.54 ± 0.16 | 1.15 ± 0.16 |

|                                    | D8.21       | D8.21       | D8.21       | D8.21       | D8.21       |
|------------------------------------|-------------|-------------|-------------|-------------|-------------|
|                                    | DMSO        | DMSO50      | DMSO50      | CDCI3       | CDCI3       |
|                                    | trans-trans | trans-trans | cis-cis     | trans-trans | trans-cis   |
| <b>NMR restraints</b>              |             |             |             |             |             |
| Total NOEs                         | 84          | 94          | 66          | 144         | 94          |
| Intra-residue                      | 22          | 38          | 24          | 48          | 30          |
| Sequential  i-j =1                 | 48          | 36          | 32          | 56          | 38          |
| Medium 1< i-j <5                   | 14          | 20          | 10          | 40          | 26          |
| Long  i-j >=5                      | 0           | 0           | 0           | 0           | 0           |
| Hydrogen bonds                     | 0           | 0           | 0           | 0           | 0           |
| PHI dihedral restraints            | 4           | 4           | 4           | 4           | 4           |
| <b>Structure Statistics</b>        |             |             |             |             |             |
| <i>Violations (mean and s.d.)</i>  |             |             |             |             |             |
| Max. distance restraint (Å)        | 0.19        | 0.45        | 0.01        | 0.30        | 0.57        |
| Ave. distance restraints viol. (Å) | 0.06 ± 0.06 | 0.08 ± 0.08 | 0.01 ± 0.00 | 0.08 ± 0.08 | 0.12 ± 0.16 |
| Max. dihedral angle (°)            | 2.23        | 2.80        | 1.23        | 3.12        | 4.25        |
| Ave. dihedral viol (°)             | 0.46 ± 0.59 | 2.17 ± 0.52 | 0.35 ± 0.47 | 2.56 ± 0.34 | 1.53 ± 1.37 |
| <b>Average pairwise RMSD</b>       |             |             |             |             |             |
| backbone (Å)                       | 0.39 ± 0.18 | 0.25 ± 0.19 | 0.13 ± 0.03 | 0.21 ± 0.13 | 0.30 ± 0.11 |
| heavy (Å)                          | 1.02 ± 0.25 | 0.74 ± 0.23 | 0.68 ± 0.13 | 0.64 ± 0.28 | 0.76 ± 0.17 |
