# Supplementary material for: Accurate de novo design of membrane-traversing macrocycles
Source: PubMed Central journal article supplement (PMC9490236; doi:10.1016/j.cell.2022.07.019), 2022-09-15
Supplement: mmc8.pdf [file mmc8.pdf]

**Accurate *de novo* design of membrane-traversing macrocycles**

**Supplemental Data File 4: Oral Bioavailability Data.** Related to Figure 5.

**Table 5.1: Pharmacokinetic data for D8.3.p1: Mean plasma levels after PO, SQ, and IV dosing in Balb/C female mice. Related to Figure 5.**

|                                                               |                                 | D8.3.p1 Mean plasma levels ( $\mu\text{M}$ ) |                     |                  |                           |
|---------------------------------------------------------------|---------------------------------|----------------------------------------------|---------------------|------------------|---------------------------|
|                                                               |                                 | PO                                           | SQ                  | IV               |                           |
|                                                               | (min)                           |                                              |                     |                  |                           |
|                                                               | 5                               |                                              |                     | 1.07 $\pm$ 0.07  |                           |
|                                                               | 15                              | 0.19 $\pm$ 0.04                              | 0.61 $\pm$ 0.13     | 0.53 $\pm$ 0.11  |                           |
|                                                               | 30                              | 0.19 $\pm$ 0.03                              | 0.78 $\pm$ 0.28     | 0.27 $\pm$ 0.09  |                           |
|                                                               | 60                              | 0.12 $\pm$ 0.04                              | 0.9 $\pm$ 0.05      | 0.06 $\pm$ 0.04  |                           |
|                                                               | 120                             | 0 $\pm$ 0.01                                 | 0.78 $\pm$ 0.09     |                  |                           |
|                                                               | 240                             |                                              | 0.34 $\pm$ 0.17     |                  |                           |
|                                                               | 360                             |                                              | 0.13 $\pm$ 0.12     |                  |                           |
|                                                               | 1440                            |                                              | 0.01 $\pm$ 0.00     |                  |                           |
| <i>Time of max concentration</i>                              | <b>Tmax</b>                     | 25 $\pm$ 0.01                                | 50 $\pm$ 17.32      |                  | (min)                     |
| <i>Max concentration</i>                                      | <b>Cmax</b>                     | 0.21 $\pm$ 0.02                              | 0.95 $\pm$ 0.12     |                  | ( $\mu\text{M}$ )         |
| <i>Initial concentration</i>                                  | <b>C0</b>                       |                                              |                     | 1.53 $\pm$ 0.07  | ( $\mu\text{M}$ )         |
| <i>Volume of distribution @ steady state</i>                  | <b>VSS</b>                      |                                              |                     | 0.72 $\pm$ 0.09  | (L/kg)                    |
| <i>Volume of distribution during elimination phase</i>        | <b>VZ</b>                       |                                              |                     | 0.78 $\pm$ 0.17  | (L/kg)                    |
| <i>Area-under-the-curve to last measureable concentration</i> | <b>AUC0-t</b>                   | 10.93 $\pm$ 4.89                             | 223.75 $\pm$ 133.45 | 25.44 $\pm$ 3.73 | (min* $\mu\text{mol/L}$ ) |
| <i>Area-under-the-curve extrapolated to infinity</i>          | <b>AUC0-<math>\infty</math></b> | 14.30 $\pm$ 3.71                             | 246.92 $\pm$ 99.85  | 26.62 $\pm$ 3.96 | (min* $\mu\text{mol/L}$ ) |
| <i>Half-life</i>                                              | <b>T1/2</b>                     | 29.15 $\pm$ 14.12                            | 154.61 $\pm$ 83.41  | 12.08 $\pm$ 2.13 | (min)                     |
| <i>Apparent clearance</i>                                     | <b>Cl/F</b>                     | 8.34E-03                                     | 5.02E-04            |                  | (L/min)                   |
| <i>Plasma clearance</i>                                       | <b>CLP</b>                      |                                              |                     | 41.78 $\pm$ 6.42 | (mL/min/kg)               |
| <i>Mean residence time</i>                                    | <b>MRT</b>                      |                                              |                     | 14.60 $\pm$ 1.29 | (min)                     |
| <i>Oral bioavailability</i>                                   | <b>F</b>                        | 10.74 $\pm$ 2.79                             |                     |                  | %                         |

**Table 5.2: Plasma levels ( $\mu\text{M}$ ) of D8.3.p1 after PO dosing (5 mg/kg) in Balb/C female mice. Related to Figure 5.**

| (min)                           | M1       | M2       | M3       | AVG      |                                           |
|---------------------------------|----------|----------|----------|----------|-------------------------------------------|
| 15                              | 0.22     | 0.2      | 0.14     | 0.19     |                                           |
| 30                              | 0.17     | 0.23     | 0.19     | 0.19     |                                           |
| 60                              | 0.06     | 0.18     | 0.12     | 0.12     |                                           |
| 120                             | 0        | 0.01     | 0        | 0        |                                           |
| 240                             | 0        | 0        | 0        | 0        |                                           |
| 360                             | 0        | 0        | 0        | 0        |                                           |
| 1440                            | 0        | 0        | 0        | 0        |                                           |
| <b>Tmax</b>                     | 15       | 30       | 30       | 25       | <i>(min)</i>                              |
| <b>Cmax</b>                     | 0.22     | 0.23     | 0.19     | 0.21     | <i>(<math>\mu\text{M}</math>)</i>         |
| <b>AUC0-t</b>                   | 8.03     | 16.58    | 8.18     | 10.93    | <i>(min*<math>\mu\text{mol/L}</math>)</i> |
| <b>AUC0-<math>\infty</math></b> | 10.04    | 16.85    | 16.01    | 14.3     | <i>(min*<math>\mu\text{mol/L}</math>)</i> |
| <b>T1/2</b>                     | 23.33    | 18.86    | 45.25    | 29.15    | <i>(min)</i>                              |
| <b>Cl/F</b>                     | 1.12E-02 | 6.71E-03 | 7.06E-03 | 8.34E-03 | <i>(L/min)</i>                            |

**Table 5.3: Plasma levels ( $\mu\text{M}$ ) of D8.3.p1 after SQ dosing (5 mg/kg) in Balb/C female mice. Related to Figure 5.**

| (min)                           | M1       | M2       | M3       | AVG      |                                           |
|---------------------------------|----------|----------|----------|----------|-------------------------------------------|
| 15                              | 0.51     | 0.7      | ND       | 0.61     |                                           |
| 30                              | 0.54     | 1.08     | 0.71     | 0.78     |                                           |
| 60                              | 0.84     | 0.92     | 0.93     | 0.9      |                                           |
| 120                             | 0.72     | 0.73     | 0.88     | 0.78     |                                           |
| 240                             | 0.23     | 0.26     | 0.53     | 0.34     |                                           |
| 360                             | 0.15     | 0        | 0.23     | 0.13     |                                           |
| 1440                            | 0        | 0        | 0.02     | 0.01     |                                           |
| <b>Tmax</b>                     | 60       | 30       | 60       | 50       | <i>(min)</i>                              |
| <b>Cmax</b>                     | 0.84     | 1.08     | 0.93     | 0.95     | <i>(<math>\mu\text{M}</math>)</i>         |
| <b>AUC0-t</b>                   | 159      | 157.5    | 354.75   | 223.75   | <i>(min*<math>\mu\text{mol/L}</math>)</i> |
| <b>AUC0-<math>\infty</math></b> | 183.06   | 195.71   | 361.99   | 246.92   | <i>(min*<math>\mu\text{mol/L}</math>)</i> |
| <b>T1/2</b>                     | 111.2    | 101.86   | 250.78   | 154.61   | <i>(min)</i>                              |
| <b>Cl/F</b>                     | 6.17E-04 | 5.77E-04 | 3.12E-04 | 5.02E-04 | <i>(L/min)</i>                            |

**Table 5.4: Plasma levels ( $\mu\text{M}$ ) of D8.3.p1 after IV dosing (1 mg/kg) in Balb/C female mice. Related to Figure 5.**

| (min)                           | M1    | M2    | M3    | AVG   |                                           |
|---------------------------------|-------|-------|-------|-------|-------------------------------------------|
| 5                               | 1.11  | 0.99  | 1.11  | 1.07  |                                           |
| 15                              | 0.53  | 0.42  | 0.63  | 0.53  |                                           |
| 30                              | 0.26  | 0.19  | 0.37  | 0.27  |                                           |
| 60                              | 0.1   | 0.04  | 0.03  | 0.06  |                                           |
| 120                             | 0     | 0     | 0     | 0     |                                           |
| 240                             | 0     | 0     | 0     | 0     |                                           |
| 360                             | 0     | 0     | 0     | 0     |                                           |
| <b>T1/2</b>                     | 14.5  | 10.5  | 11.24 | 12.08 | <i>(min)</i>                              |
| <b>C0</b>                       | 1.61  | 1.52  | 1.47  | 1.53  | <i>(<math>\mu\text{M}</math>)</i>         |
| <b>VSS</b>                      | 0.79  | 0.75  | 0.62  | 0.72  | <i>(L/kg)</i>                             |
| <b>VZ</b>                       | 0.89  | 0.87  | 0.59  | 0.78  | <i>(L/kg)</i>                             |
| <b>AUC0-t</b>                   | 26.32 | 21.35 | 28.66 | 25.44 | <i>(min*<math>\mu\text{mol/L}</math>)</i> |
| <b>AUC0-<math>\infty</math></b> | 28.69 | 22.06 | 29.12 | 26.62 | <i>(min*<math>\mu\text{mol/L}</math>)</i> |
| <b>CLP</b>                      | 37.62 | 49.17 | 38.55 | 41.78 | <i>(mL/min/kg)</i>                        |
| <b>MRT</b>                      | 15.45 | 13.12 | 15.23 | 14.6  | <i>(min)</i>                              |

**Table 5.5: Pharmacokinetic data for D10.1: Mean plasma levels after PO, SQ, and IV dosing in Balb/C female mice. Related to Figure 5.**

|                                                               |                                 | <b>D10.1 Mean plasma levels (<math>\mu\text{M}</math>)</b> |                     |                                                               |
|---------------------------------------------------------------|---------------------------------|------------------------------------------------------------|---------------------|---------------------------------------------------------------|
| <b>(min)</b>                                                  |                                 | <b>PO</b>                                                  | <b>SQ</b>           | <b>IV</b>                                                     |
|                                                               | <b>5</b>                        |                                                            |                     | 21.00 $\pm$ 5.99                                              |
|                                                               | <b>15</b>                       | 2.58 $\pm$ 0.59                                            | 2.53 $\pm$ 1.18     | 7.58 $\pm$ 1.95                                               |
|                                                               | <b>30</b>                       | 2.92 $\pm$ 0.63                                            | 3.55 $\pm$ 1.67     | 4.92 $\pm$ 2.11                                               |
|                                                               | <b>60</b>                       | 1.78 $\pm$ 0.31                                            | 3.93 $\pm$ 1.78     | 2.19 $\pm$ 0.29                                               |
|                                                               | <b>120</b>                      | 0.72 $\pm$ 0.15                                            | ND                  | 1.03 $\pm$ 0.06                                               |
|                                                               | <b>240</b>                      | 0.16 $\pm$ 0.03                                            | ND                  | 0.44 $\pm$ 0.03                                               |
|                                                               | <b>360</b>                      | 0.07 $\pm$ 0.06                                            | 2.29 $\pm$ 0.15     | 0.31 $\pm$ 0.09                                               |
|                                                               | <b>1440</b>                     |                                                            | 0.01 $\pm$ 0.02     |                                                               |
| <b>Time of max concentration</b>                              | <b>Tmax</b>                     | 30 $\pm$ 0.00                                              | 150 $\pm$ 182.48    | <b>(min)</b>                                                  |
| <b>Max concentration</b>                                      | <b>Cmax</b>                     | 2.92 $\pm$ 0.63                                            | 4.14 $\pm$ 1.51     | <b>(<math>\mu\text{M}</math>)</b>                             |
| <b>Initial concentration</b>                                  | <b>C0</b>                       |                                                            |                     | 37.77 $\pm$ 21.43 <b>(<math>\mu\text{M}</math>)</b>           |
| <b>Volume of distribution @ steady state</b>                  | <b>VSS</b>                      |                                                            |                     | 0.25 $\pm$ 0.08 <b>(L/kg)</b>                                 |
| <b>Volume of distribution during elimination phase</b>        | <b>VZ</b>                       |                                                            |                     | 0.32 $\pm$ 0.07 <b>(L/kg)</b>                                 |
| <b>Area-under-the-curve to last measureable concentration</b> | <b>AUC0-t</b>                   | 270.40 $\pm$ 55.52                                         | 1879.5 $\pm$ 1501.5 | 720.90 $\pm$ 121.67 <b>(min*<math>\mu\text{mol/L}</math>)</b> |
| <b>Area-under-the-curve extrapolated to infinity</b>          | <b>AUC0-<math>\infty</math></b> | 279.94 $\pm$ 55.31                                         | 2867.2 $\pm$ 1016.5 | 751.94 $\pm$ 110.39 <b>(min*<math>\mu\text{mol/L}</math>)</b> |
| <b>Half-life</b>                                              | <b>T1/2</b>                     | 60.29 $\pm$ 9.35                                           | 225.38 $\pm$ 48.70  | 67.38 $\pm$ 6.78 <b>(min)</b>                                 |
| <b>Apparent clearance</b>                                     | <b>Cl/F</b>                     | 7.85E-04                                                   | 7.96E-05            | <b>(L/min)</b>                                                |
| <b>Plasma clearance</b>                                       | <b>CLP</b>                      |                                                            |                     | 3.26 $\pm$ 0.37 <b>(mL/min/kg)</b>                            |
| <b>Mean residence time</b>                                    | <b>MRT</b>                      |                                                            |                     | 59.54 $\pm$ 10.01 <b>(min)</b>                                |
| <b>Oral bioavailability</b>                                   | <b>F</b>                        | 7.48 $\pm$ 1.79                                            |                     | <b>%</b>                                                      |

**Table 5.6: Plasma levels ( $\mu\text{M}$ ) of D10.1 after PO dosing (12.2 mg/kg) in Balb/C female mice. Related to Figure 5.**

| (min)                           | M1       | M2       | M3       | AVG      |                                           |
|---------------------------------|----------|----------|----------|----------|-------------------------------------------|
| 15                              | 2.22     | 3.26     | 2.26     | 2.58     |                                           |
| 30                              | 2.49     | 3.64     | 2.64     | 2.92     |                                           |
| 60                              | 1.57     | 2.14     | 1.64     | 1.78     |                                           |
| 120                             | 0.54     | 0.8      | 0.81     | 0.72     |                                           |
| 240                             | 0.13     | 0.18     | 0.17     | 0.16     |                                           |
| 360                             | 0        | 0.1      | 0.1      | 0.07     |                                           |
| 1440                            | 0        | 0        | 0        | 0        |                                           |
| <b>Tmax</b>                     | 30       | 30       | 30       | 30       | <i>(min)</i>                              |
| <b>Cmax</b>                     | 2.49     | 3.64     | 2.64     | 2.92     | <i>(<math>\mu\text{M}</math>)</i>         |
| <b>AUC0-t</b>                   | 216.96   | 327.78   | 266.45   | 270.4    | <i>(min*<math>\mu\text{mol/L}</math>)</i> |
| <b>AUC0-<math>\infty</math></b> | 226.62   | 337.03   | 276.18   | 279.94   | <i>(min*<math>\mu\text{mol/L}</math>)</i> |
| <b>T1/2</b>                     | 49.88    | 63.05    | 67.95    | 60.29    | <i>(min)</i>                              |
| <b>CI/F</b>                     | 9.44E-04 | 6.35E-04 | 7.75E-04 | 7.85E-04 | <i>(L/min)</i>                            |

**Table 5.7: Plasma levels ( $\mu\text{M}$ ) of D10.1 after SQ dosing (12.2 mg/kg) in Balb/C female mice. Related to Figure 5.**

| (min)                           | M1     | M2       | M3       | AVG      |                                           |
|---------------------------------|--------|----------|----------|----------|-------------------------------------------|
| 15                              | 1.39   | 2.44     | 3.75     | 2.53     |                                           |
| 30                              | 1.81   | 3.69     | 5.15     | 3.55     |                                           |
| 60                              | 1.87   | 4.88     | 5.03     | 3.93     |                                           |
| 120                             | ND     | ND       | ND       | ND       |                                           |
| 240                             | ND     | ND       | ND       | ND       |                                           |
| 360                             | 2.4    | ND       | 2.19     | 2.29     |                                           |
| 1440                            | 0      | 0.03     | 0        | 0.01     |                                           |
| <b>Tmax</b>                     | 360    | 60       | 30       | 150      | <i>(min)</i>                              |
| <b>Cmax</b>                     | 2.4    | 4.88     | 5.15     | 4.14     | <i>(<math>\mu\text{M}</math>)</i>         |
| <b>AUC0-t</b>                   | 730.93 | 3578.6   | 1329.09  | 1879.54  | <i>(min*<math>\mu\text{mol/L}</math>)</i> |
| <b>AUC0-<math>\infty</math></b> | NA     | 3585.94  | 2148.41  | 2867.17  | <i>(min*<math>\mu\text{mol/L}</math>)</i> |
| <b>T1/2</b>                     | NA     | 190.94   | 259.81   | 225.38   | <i>(min)</i>                              |
| <b>CI/F</b>                     | NA     | 5.97E-05 | 9.96E-05 | 7.96E-05 | <i>(L/min)</i>                            |

**Table 5.8: Plasma levels ( $\mu\text{M}$ ) of D10.1 after IV dosing (2.45 mg/kg) in Balb/C female mice. Related to Figure 5.**

| (min)                           | M1     | M2     | M3     | AVG    |                                           |
|---------------------------------|--------|--------|--------|--------|-------------------------------------------|
| 5                               | 15.45  | 20.19  | 27.35  | 21     |                                           |
| 15                              | 9.12   | 8.25   | 5.39   | 7.58   |                                           |
| 30                              | 4.05   | 3.37   | 7.33   | 4.92   |                                           |
| 60                              | 1.91   | 2.17   | 2.49   | 2.19   |                                           |
| 120                             | 1.1    | 1      | 1      | 1.03   |                                           |
| 240                             | 0.47   | 0.41   | 0.45   | 0.44   |                                           |
| 360                             | 0.37   | 0.36   | 0.21   | 0.31   |                                           |
| <b>T1/2</b>                     | 72.41  | 70.07  | 59.67  | 67.38  | <i>(min)</i>                              |
| <b>C0</b>                       | 20.11  | 31.58  | 61.61  | 37.77  | <i>(<math>\mu\text{M}</math>)</i>         |
| <b>VSS</b>                      | 0.32   | 0.28   | 0.16   | 0.25   | <i>(L/kg)</i>                             |
| <b>VZ</b>                       | 0.36   | 0.35   | 0.24   | 0.32   | <i>(L/kg)</i>                             |
| <b>AUC0-t</b>                   | 634.82 | 667.79 | 860.1  | 720.9  | <i>(min*<math>\mu\text{mol/L}</math>)</i> |
| <b>AUC0-<math>\infty</math></b> | 673.47 | 704.18 | 878.17 | 751.94 | <i>(min*<math>\mu\text{mol/L}</math>)</i> |
| <b>CLP</b>                      | 3.46   | 3.48   | 2.83   | 3.26   | <i>(mL/min/kg)</i>                        |
| <b>MRT</b>                      | 68.66  | 61.13  | 48.84  | 59.54  | <i>(min)</i>                              |

**Table 5.9: Plasma concentration (ng/mL) of D11.3 after IV (1.00 mg/kg) dose administration in male Swiss Albino mice. Related to Figure 5.**

| Time (h)            | M1 -    | M2-     | M3-     | Mean           | Std Dev | % CV  |
|---------------------|---------|---------|---------|----------------|---------|-------|
| 0.08                | 3319.8  | 4091.53 | 3825.09 | <b>3745.47</b> | 391.98  | 10.47 |
| 0.25                | 3305.02 | 3779.15 | 2973.54 | <b>3352.57</b> | 404.9   | 12.08 |
| 0.5                 | 1656.03 | 2566.56 | 1814.39 | <b>2012.33</b> | 486.47  | 24.17 |
| 1                   | 931.71  | 1218.22 | 1283.47 | <b>1144.47</b> | 187.12  | 16.35 |
| 3                   | 887.86  | 328.77  | 318.62  | <b>511.75</b>  | 325.76  | 63.66 |
| 5                   | 240.02  | 271.55  | 289.17  | <b>266.91</b>  | 24.9    | 9.33  |
| 8                   | 399.46  | 124.26  | 182.53  | <b>235.42</b>  | 145.02  | 61.6  |
| 24                  | 17.65   | 30.97   | 34.16   | <b>27.59</b>   | 8.76    | 31.74 |
| Dose (mg/kg)        | 1       | 1       | 1       | <b>1</b>       | 0       | 0     |
| C0 (ng/mL)          | -       | -       | -       | <b>3957.56</b> | -       | -     |
| T1/2 (h)            | -       | -       | -       | <b>5.58</b>    | -       | -     |
| AUC0-last (ng·h/mL) | -       | -       | -       | <b>6965.11</b> | -       | -     |
| AUC0-inf (ng·h/mL)  | -       | -       | -       | <b>7187.15</b> | -       | -     |
| AUCExtra(%)         | -       | -       | -       | <b>3.09</b>    | -       | -     |
| Cl (ml/min/kg)      | -       | -       | -       | <b>2.32</b>    | -       | -     |
| Vd (L/kg)           | -       | -       | -       | <b>1.12</b>    | -       | -     |
| MRT0-last (h)       | -       | -       | -       | <b>4.64</b>    | -       | -     |
| Rsqr                | -       | -       | -       | <b>0.9904</b>  | -       | -     |



**Table 5.10: Plasma concentration (ng/mL) of D11.3 after PO (10.00 mg/kg) dose administration in male Swiss Albino mice. Related to Figure 5.**

| Time (h)            | M1 -    | M2-     | M3-     | Mean            | Std Dev | % CV  |
|---------------------|---------|---------|---------|-----------------|---------|-------|
| 0.08                | 47.49   | 76.49   | 84.94   | <b>69.64</b>    | 19.64   | 28.21 |
| 0.25                | 454     | 804.64  | 992.29  | <b>750.31</b>   | 273.23  | 36.42 |
| 0.5                 | 1880.71 | 2858.02 | 2832.99 | <b>2523.91</b>  | 557.17  | 22.08 |
| 1                   | 2950.38 | 3417.67 | 2525.44 | <b>2964.5</b>   | 446.28  | 15.05 |
| 3                   | 3249.94 | 3660.57 | 3578.88 | <b>3496.46</b>  | 217.37  | 6.22  |
| 5                   | 3313.72 | 2427.94 | 1866.9  | <b>2536.19</b>  | 729.46  | 28.76 |
| 8                   | 1232.5  | 1764.28 | 1439.78 | <b>1478.85</b>  | 268.03  | 18.12 |
| 24                  | 177.35  | 48.47   | 59.29   | <b>95.04</b>    | 71.49   | 75.22 |
| Dose (mg/kg)        | 10      | 10      | 10      | <b>10</b>       | 0       | 0     |
| Cmax (ng/mL)        | -       | -       | -       | <b>3496.46</b>  | -       | -     |
| Tmax (h)            | -       | -       | -       | <b>3</b>        | -       | -     |
| AUC0-last (ng·h/mL) | -       | -       | -       | <b>28242.38</b> | -       | -     |
| AUC0-inf (ng·h/mL)  | -       | -       | -       | <b>28793.58</b> | -       | -     |
| AUCExtra(%)         | -       | -       | -       | <b>1.91</b>     | -       | -     |
| MRT0-last (h)       | -       | -       | -       | <b>6.32</b>     | -       | -     |
| F (%)               | -       | -       | -       | <b>40.06</b>    | -       | -     |
| Rsqr                | -       | -       | -       | <b>1</b>        | -       | -     |

**Table 5.11: Plasma concentration (ng/mL) of D11.3 after SC (5.00 mg/kg) dose administration in male Swiss Albino mice. Related to Figure 5.**

| Time (h)            | M1 -   | M2-    | M3-    | Mean           | Std Dev | % CV    |
|---------------------|--------|--------|--------|----------------|---------|---------|
| <b>PD</b>           | 0      | 0      | 0      | <b>0</b>       | 0       | #DIV/0! |
| 0.08                | 12.41  | 9.86   | 8.17   | <b>10.15</b>   | 2.13    | 21.04   |
| 0.25                | 60.87  | 22.1   | 22.16  | <b>35.04</b>   | 22.37   | 63.83   |
| 0.5                 | 22.46  | 23.29  | 70.26  | <b>38.67</b>   | 27.36   | 70.75   |
| 1                   | 52.72  | 45.05  | 34.59  | <b>44.12</b>   | 9.1     | 20.63   |
| 3                   | 141.22 | 103.85 | 139.25 | <b>128.11</b>  | 21.03   | 16.42   |
| 5                   | 117.42 | 136.91 | 188.23 | <b>147.52</b>  | 36.58   | 24.8    |
| 8                   | 153.34 | 93.4   | 96.35  | <b>114.36</b>  | 33.79   | 29.54   |
| 24                  | 57.62  | 60.78  | 33.12  | <b>50.51</b>   | 15.14   | 29.98   |
| Dose (mg/kg)        | 5      | 5      | 5      | <b>5</b>       | 0       | 0       |
| Cmax (ng/mL)        | -      | -      | -      | <b>147.52</b>  | -       | -       |
| Tmax (h)            | -      | -      | -      | <b>5</b>       | -       | -       |
| AUC0-last (ng·h/mL) | -      | -      | -      | <b>2122.81</b> | -       | -       |
| AUC0-inf (ng·h/mL)  | -      | -      | -      | <b>3047.15</b> | -       | -       |
| AUCExtra(%)         | -      | -      | -      | <b>30.33</b>   | -       | -       |
| MRT0-last (h)       | -      | -      | -      | <b>10.71</b>   | -       | -       |
| F (%)               | -      | -      | -      | <b>8.48</b>    | -       | -       |
| Rsqr                | -      | -      | -      | <b>0.9933</b>  | -       | -       |

**Table 5.12: Plasma levels for D11.2 after IV, SQ, and PO dosing (1 mg/kg) in male SD rats. Related to Figure 5.**

| Route     | Subject     | T1/2z       | Tmax          | Cmax        | C0         | AUClast     | AUC <sub>∞</sub> | Vz          | CL          | MRT <sub>∞</sub> | Vss         | %F          |
|-----------|-------------|-------------|---------------|-------------|------------|-------------|------------------|-------------|-------------|------------------|-------------|-------------|
|           |             | hr          | hr            | ng/mL       | ng/mL      | h*ng/mL     | h*ng/mL          | L/kg        | L/hr/kg     | hr               | L/kg        |             |
| IV        | R1          | 2.08        | 0.0833        | 499         | 626        | 642         | 674              | 4.46        | 1.48        | 2.18             | 3.23        | NA          |
| IV        | R2          | 2.05        | 0.0833        | 519         | 669        | 702         | 738              | 4.00        | 1.35        | 2.34             | 3.17        | NA          |
| IV        | R3          | 2.74        | 0.0833        | 796         | 1234       | 858         | 926              | 4.27        | 1.08        | 2.51             | 2.72        | NA          |
| <b>IV</b> | <b>Mean</b> | <b>2.29</b> | <b>0.0833</b> | <b>605</b>  | <b>843</b> | <b>734</b>  | <b>780</b>       | <b>4.24</b> | <b>1.31</b> | <b>2.35</b>      | <b>3.04</b> | <b>NA</b>   |
| IV        | SD          | 0.389       | 0.0000        | 166         | 339        | 111         | 131              | 0.231       | 0.206       | 0.169            | 0.283       | NA          |
| PO        | R4          | 2.42        | 0.500         | 31.3        | NA         | 66.8        | 81.3             | NA          | NA          | 3.38             | NA          | 12.1        |
| PO        | R5          | 2.06        | 0.250         | 35.2        | NA         | 89.3        | 95.9             | NA          | NA          | 3.02             | NA          | 13.0        |
| PO        | R6          | 2.53        | 0.500         | 28.2        | NA         | 59.1        | 75.8             | NA          | NA          | 3.86             | NA          | 8.18        |
| <b>PO</b> | <b>Mean</b> | <b>2.33</b> | <b>0.416</b>  | <b>31.6</b> | <b>NA</b>  | <b>71.7</b> | <b>84.3</b>      | <b>NA</b>   | <b>NA</b>   | <b>3.42</b>      | <b>NA</b>   | <b>11.1</b> |
| PO        | SD          | 0.246       | 0.144         | 3.51        | NA         | 15.7        | 10.4             | NA          | NA          | 0.422            | NA          | 2.55        |
| SQ        | R7          | 4.52        | 4.00          | 131         | NA         | 1040        | 1080             | NA          | NA          | 6.81             | NA          | 160         |
| SQ        | R8          | 5.00        | 4.00          | 99.4        | NA         | 741         | 777              | NA          | NA          | 7.64             | NA          | 105         |
| SQ        | R9          | 3.71        | 4.00          | 95.1        | NA         | 841         | 853              | NA          | NA          | 6.14             | NA          | 92.1        |
| <b>SQ</b> | <b>Mean</b> | <b>4.41</b> | <b>4.00</b>   | <b>109</b>  | <b>NA</b>  | <b>874</b>  | <b>903</b>       | <b>NA</b>   | <b>NA</b>   | <b>6.86</b>      | <b>NA</b>   | <b>119</b>  |
| SQ        | SD          | 0.654       | 0.00          | 19.6        | NA         | 152         | 158              | NA          | NA          | 0.753            | NA          | 36.2        |
